# Supplementary material for: Accurate Ring Strain Energies of Unsaturated Three-Membered Heterocycles with One Group 13–16 Element
Source: PubMed Central journal article supplement (PMC9066411; doi:10.1021/acs.inorgchem.2c00067), 2022-04-20
Supplement: ic2c00067_si_001.pdf [file ic2c00067_si_001.pdf]

## Supporting Information

# Accurate Ring Strain Energies of Unsaturated Three-Membered Heterocycles with One Group 13–16 Element

Alicia Rey Planells<sup>a</sup> and Arturo Espinosa Ferao<sup>\*a</sup>

<sup>a</sup> Depto. Química Orgánica, Facultad de Química, Campus de Espinardo, Universidad de Murcia, 30100 Murcia (Spain), E-mail: artuesp@um.es.

### Table of contents

|                                                                                                                                                         |        |
|---------------------------------------------------------------------------------------------------------------------------------------------------------|--------|
| <u>Figure S1.</u> Computed (B3LYP/def2-TZVPP) structure with BCP and bond paths for <b>1</b> <sup>Ti*</sup> .                                           | S2     |
| <u>Figure S2.</u> Plot of $k^0_{C-EI}$ vs p-character (%) used by “EI” in C-EI bond in <b>1</b> .                                                       | S2     |
| <u>Figure S3.</u> Plot of angular deviation for the C-EI bond vs p-character (%) used by “EI” in C-EI bond in <b>1</b> .                                | S2     |
| <u>Figure S4.</u> Plot of RSE vs p-character (%) used by “EI” for C-EI bonds in <b>1</b> .                                                              | S3     |
| <u>Figure S5.</u> Computed (B3LYP/def2-TZVP) Kohn–Sham isosurfaces for <b>1</b> <sup>Si</sup> .                                                         | S3     |
| <u>Figure S6.</u> Plot of RSE vs computed (B3LYP/6311+G(d,p) or def2-TZVPP) NICS(2) for <b>1</b> .                                                      | S3     |
| <u>Figure S7.</u> Plot of RSE vs NLMO-BO <sub>C=C</sub> for compounds <b>1</b> .                                                                        | S4     |
| <u>Table S1.</u> Calculated magnetic, bond length and bond strength parameters for <b>1</b> <sup>EI</sup> and <b>2</b> <sup>EI</sup> .                  | S5     |
| <u>Table S2.</u> Calculated (B3LYP-D3/def2-TZVPecp) C-EI bond distances (Å) for <b>3</b> <sup>EI</sup> and <b>4</b> <sup>EI</sup> .                     | S6     |
| <u>Table S3.</u> T1 diagnostic, single-reference contribution (%) and RSE values at the CCSD(T)(fc)/def2-TZVPP and CASSCF(n,m)/MRACPF/def2-SVPD levels. | S6     |
| <u>Calculated structures.</u> Cartesian coordinates and energies for all computed TS and minima.                                                        | S7-S40 |

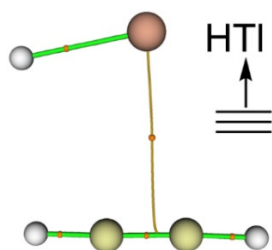

Figure S1. Computed (B3LYP/def2-TZVPP//B3LYP/def2-TZVP) structure with BCP (small orange spheres) and bond paths for pseudo-thallirene ( $I^{1*}$ ).

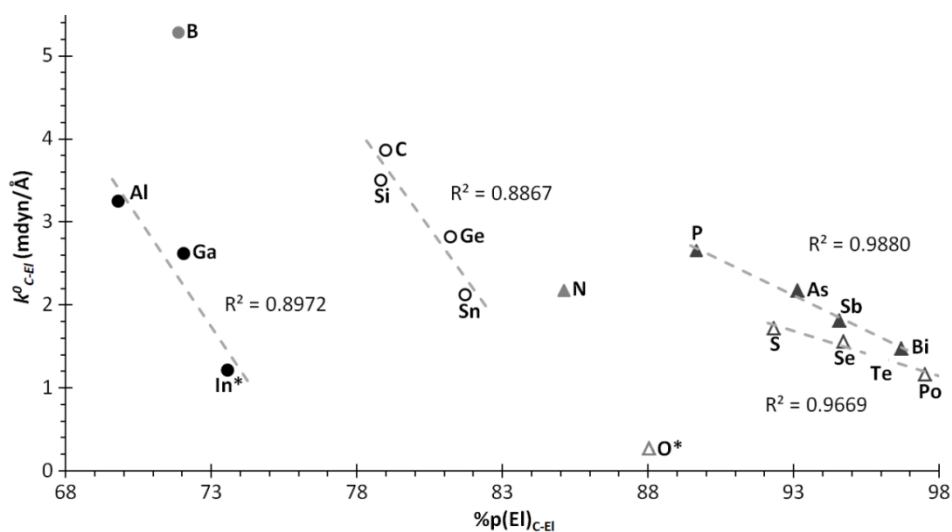

Figure S2. Plot of  $k^0_{C-EI}$  vs p-character (%) of AO used by heteroatom “EI” in C-EI bond in **1**.

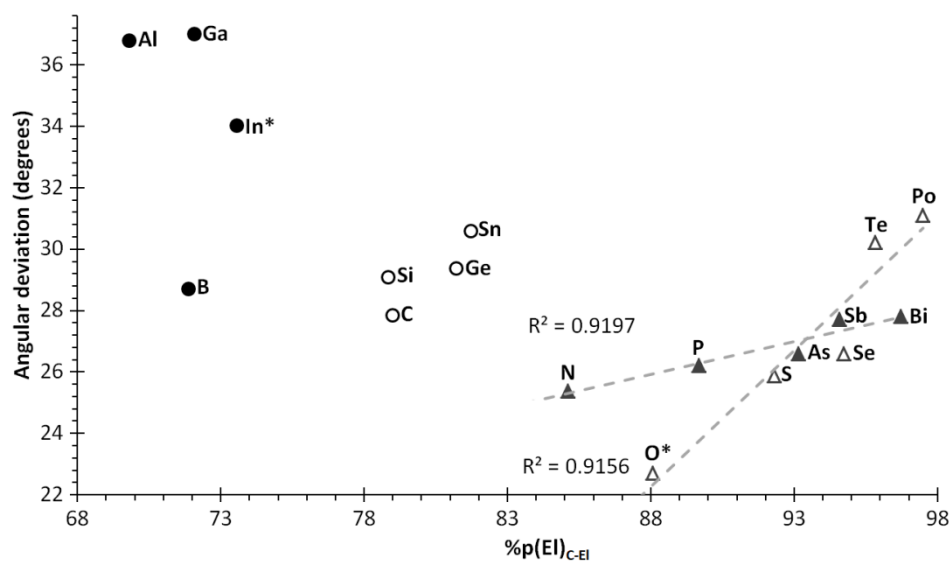

Figure S3. Plot of angular deviation of the C-EI bond vs p-character (%) of the AO used by heteroatom “EI” in C-EI bond in **1**.

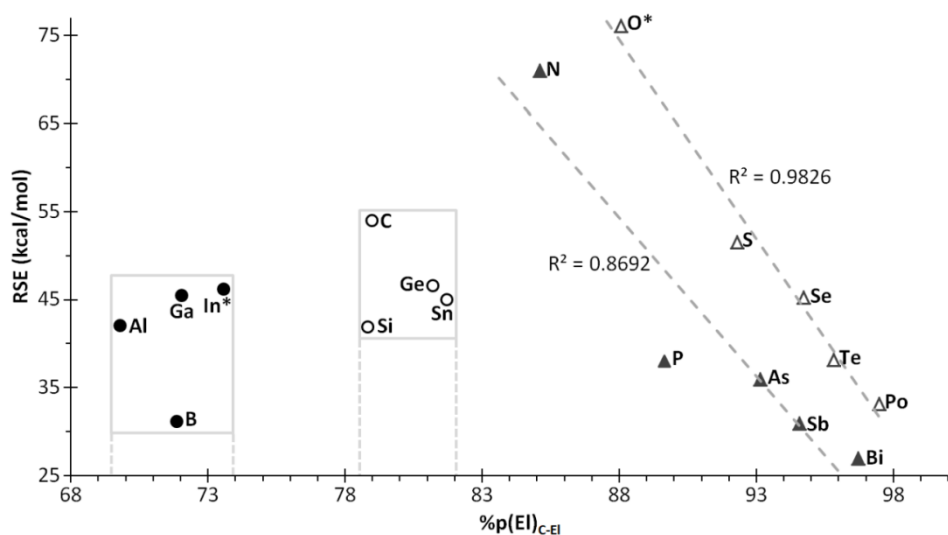

**Figure S4.** Plot of RSE vs p-character (%) of AO used by the heteroatom “EI” for its endocyclic C-EI bonds in **1**.

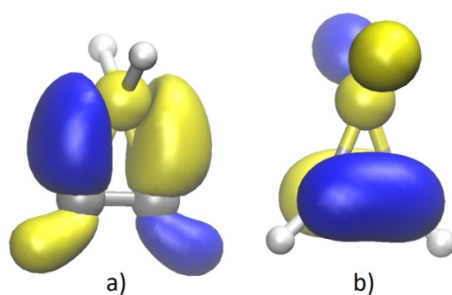

**Figure S5.** Computed (B3LYP/def2-TZVP) Kohn–Sham isosurfaces (0.07 au) for a) HOMO and b) HOMO-1 of **1**<sup>Si</sup>.

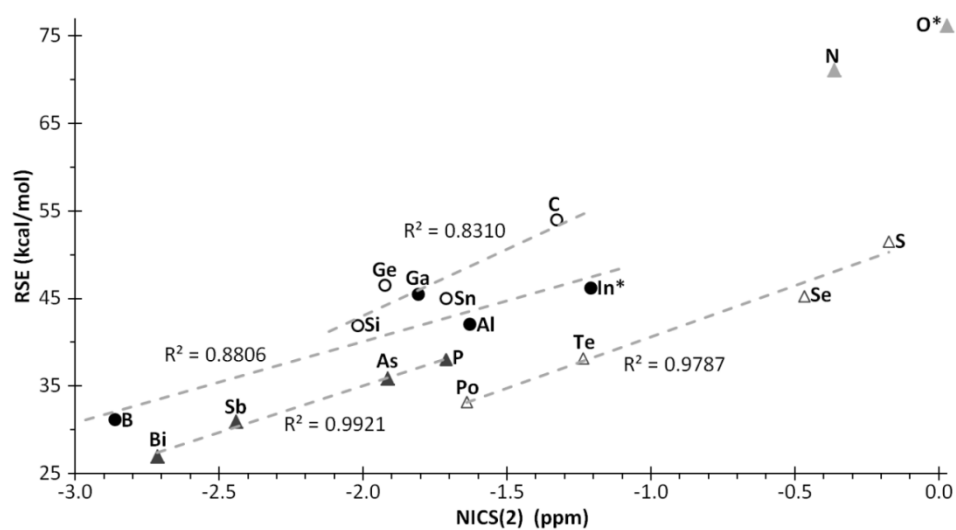

**Figure S6.** Plot of RSE vs computed (B3LYP/6311+G(d,p) or def2-TZVPP) NICS(2) (ppm) for compounds **1**.

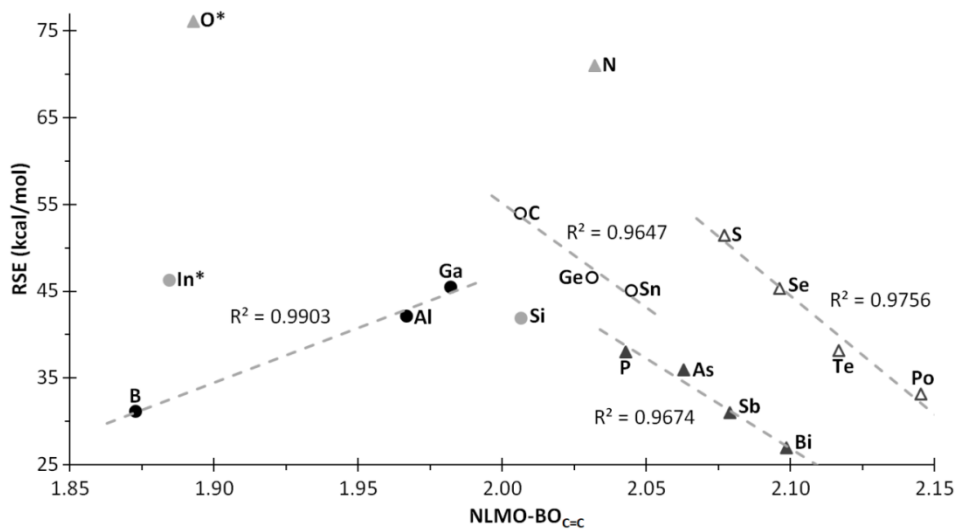

Figure S7. Plot of RSE vs NLMO-BO<sub>C=C</sub> for compounds **1** (**1**<sup>In\*</sup>, **1**<sup>Si</sup>, **1**<sup>N</sup> and **1**<sup>O\*</sup> are excluded from the linear correlation).

Table S1. Calculated magnetic, bond length and bond strength parameters for compounds **1<sup>EI</sup>** and **2<sup>EI</sup>**.

|                        | NICS(1) <sup>a)</sup> | NICS(1) <sub>zz</sub> <sup>a)</sup> | d <sub>C-C</sub> <sup>c)</sup> | NLMO-BO <sub>CC</sub> | WBI <sub>CC</sub> | (G/ρ) <sub>CC</sub> <sup>b)</sup> | d <sub>C-EI</sub> <sup>c)</sup> | NLMO-BO <sub>C-EI</sub> | WBI <sub>C-EI</sub> | (G/ρ) <sub>C-EI</sub> <sup>b)</sup> | (G/ρ) <sub>RCP</sub> <sup>b)</sup> |
|------------------------|-----------------------|-------------------------------------|--------------------------------|-----------------------|-------------------|-----------------------------------|---------------------------------|-------------------------|---------------------|-------------------------------------|------------------------------------|
| <b>1<sup>B</sup></b>   | -14.38                | -26.33                              | 1.346                          | 1.873                 | 1.720             | 0.500                             | 1.468                           | 1.035                   | 1.146               | 1.301                               | 1.454                              |
| <b>1<sup>Al</sup></b>  | -9.35                 | -10.82                              | 1.369                          | 1.967                 | 1.945             | 0.428                             | 1.855                           | 0.598                   | 0.779               | 1.425                               | 1.653                              |
| <b>1<sup>Ga</sup></b>  | -8.80                 | -11.18                              | 1.356                          | 1.982                 | 1.951             | 0.423                             | 1.899                           | 0.677                   | 0.843               | 1.096                               | 1.256                              |
| <b>1<sup>In*</sup></b> | -6.26                 | -22.25                              | 1.330                          | 1.885                 | 2.028             | 0.442                             | 2.210, 2.063                    | 0.507, 0.818            | 0.680, 0.846        | 0.815                               | -                                  |
| <b>1<sup>C</sup></b>   | -6.94                 | -16.19                              | 1.287                          | 2.006                 | 1.968             | 0.557                             | 1.505                           | 1.021                   | 0.981               | 0.458                               | 0.852                              |
| <b>1<sup>Si</sup></b>  | -9.82                 | -16.09                              | 1.33                           | 2.007                 | 1.982             | 0.477                             | 1.812                           | 0.696                   | 0.883               | 1.261                               | 1.463                              |
| <b>1<sup>Ge</sup></b>  | -8.53                 | -14.36                              | 1.319                          | 2.031                 | 2.035             | 0.472                             | 1.923                           | 0.721                   | 0.871               | 0.907                               | 1.101                              |
| <b>1<sup>Sn</sup></b>  | -7.45                 | -9.90                               | 1.320                          | 2.045                 | 2.067             | 0.458                             | 2.118                           | 0.704                   | 0.845               | 0.876                               | 1.095                              |
| <b>1<sup>N</sup></b>   | -2.18                 | -9.38                               | 1.269                          | 2.032                 | 2.021             | 0.566                             | 1.517                           | 0.858                   | 0.941               | 0.601                               | 0.954                              |
| <b>1<sup>P</sup></b>   | -7.42                 | -12.80                              | 1.292                          | 2.043                 | 2.046             | 0.520                             | 1.840                           | 0.852                   | 0.927               | 0.719                               | 1.007                              |
| <b>1<sup>As</sup></b>  | -8.49                 | -14.85                              | 1.287                          | 2.063                 | 2.097             | 0.515                             | 1.985                           | 0.849                   | 0.889               | 0.647                               | 0.882                              |
| <b>1<sup>Sb</sup></b>  | -9.81                 | -16.52                              | 1.287                          | 2.079                 | 2.137             | 0.507                             | 2.180                           | 0.816                   | 0.850               | 0.744                               | 0.957                              |
| <b>1<sup>Bi</sup></b>  | -10.83                | -18.25                              | 1.280                          | 2.099                 | 2.179             | 0.513                             | 2.293                           | 0.841                   | 0.820               | 0.738                               | 0.938                              |
| <b>1<sup>O*</sup></b>  | -0.66                 | -4.33                               | 1.269                          | 1.893                 | 1.961             | 0.545                             | 1.673, 1.376                    | 0.596, 0.809            | 0.875, 1.014        | 0.108, 0.795                        | -                                  |
| <b>1<sup>S</sup></b>   | -2.01                 | -4.01                               | 1.271                          | 2.077                 | 2.105             | 0.544                             | 1.855                           | 1.000                   | 0.922               | 0.483                               | 0.753                              |
| <b>1<sup>Se</sup></b>  | -4.18                 | -8.23                               | 1.268                          | 2.096                 | 2.148             | 0.541                             | 2.008                           | 1.011                   | 0.882               | 0.559                               | 0.784                              |
| <b>1<sup>Te</sup></b>  | -6.96                 | -11.92                              | 1.267                          | 2.117                 | 2.196             | 0.537                             | 2.206                           | 0.963                   | 0.837               | 0.644                               | 0.846                              |
| <b>1<sup>Po</sup></b>  | -9.29                 | -15.69                              | 1.261                          | 2.145                 | 2.247             | 0.549                             | 2.324                           | 0.984                   | 0.786               | 0.701                               | 0.858                              |
| <b>2<sup>N</sup></b>   | -                     | -                                   | 1.447                          | 1.034                 | 1.020             | 0.443                             | 1.246, 1.547                    | 1.751, 0.914            | 1.968, 0.941        | 1.209, 0.730                        | 0.804                              |
| <b>2<sup>P</sup></b>   | -                     | -                                   | 1.477                          | 1.064                 | 1.104             | -                                 | 1.637, 1.906                    | 1.667, 0.816            | 1.852, 0.915        | -                                   | -                                  |
| <b>2<sup>As</sup></b>  | -                     | -                                   | 1.464                          | 1.073                 | 1.139             | -                                 | 1.765, 2.058                    | 1.656, 0.823            | 1.822, 0.901        | -                                   | -                                  |
| <b>2<sup>Sb</sup></b>  | -                     | -                                   | 1.456                          | 1.079                 | 1.181             | -                                 | 1.972, 2.272                    | 1.603, 0.820            | 1.766, 0.883        | -                                   | -                                  |
| <b>2<sup>Bi</sup></b>  | -                     | -                                   | 1.445                          | 1.087                 | 1.208             | -                                 | 2.067, 2.385                    | 1.623, 0.842            | 1.752, 0.872        | -                                   | -                                  |

<sup>a)</sup> In ppm; <sup>b)</sup> in a.u.; <sup>c)</sup> in Å.

**Table S2.** Calculated (B3LYP-D3/def2-TZVPecp) C-El bond distances (Å) for homodesmotic ring opening compounds **3<sup>El</sup>** and **4<sup>El</sup>**

| <b>El</b>             | <b>B</b> | <b>Al</b> | <b>Ga</b> | <b>In</b> | <b>C</b> | <b>Si</b> | <b>Ge</b> | <b>Sn</b> | <b>N</b> | <b>P</b> | <b>As</b> | <b>Sb</b> | <b>Bi</b> | <b>O</b> | <b>S</b> | <b>Se</b> | <b>Te</b> | <b>Po</b> |
|-----------------------|----------|-----------|-----------|-----------|----------|-----------|-----------|-----------|----------|----------|-----------|-----------|-----------|----------|----------|-----------|-----------|-----------|
| <b>3<sup>El</sup></b> | 1.541    | 1.942     | 1.961     | 2.153     | 1.503    | 1.865     | 1.952     | 2.143     | 1.378    | 1.831    | 1.96      | 2.155     | 2.254     | 1.364    | 1.755    | 1.906     | 2.108     | 2.218     |
| <b>4<sup>El</sup></b> | 1.557    | 1.956     | 1.978     | 2.173     | 1.498    | 1.869     | 1.956     | 2.153     | 1.387    | 1.817    | 1.964     | 2.164     | 2.267     | 1.368    | 1.752    | 1.907     | 2.112     | 2.224     |

**Table S3.** T1 diagnostic, single reference (SR) contribution (%) of and RSE values (kcal/mol) at the CCSD(T)(fc)/def2-TZVPP and CASSCF(n,m)/MRACPF/def2-SVPD levels (in parentheses).

|                        | <b>T1 diagnostic</b> | <b>% SR</b> | <b>RSE</b>    | <b>(n,m)</b> |
|------------------------|----------------------|-------------|---------------|--------------|
| <b>1<sup>In*</sup></b> | 0.02                 | 76.2        | 46.22 (46.29) | (6,6)        |
| <b>1<sup>O*</sup></b>  | 0.02                 | 80.6        | 76.10 (71.31) | (6,6)        |
| <b>2<sup>P*</sup></b>  | 0.01                 | 92.1        | 32.57 (31.38) | (8,6)        |
| <b>2<sup>As*</sup></b> | 0.01                 | 89.9        | 32.73 (32.95) | (8,6)        |
| <b>2<sup>Sb*</sup></b> | 0.02                 | 86.5        | 30.91 (29.71) | (8,6)        |
| <b>2<sup>Bi*</sup></b> | 0.02                 | 84.3        | 28.12 (28.11) | (8,6)        |

## Calculated structures

Cartesian coordinates (in Å), G correction (G-E) and ZPE (in hartrees) for TSs and minima were computed at B3LYP-D3/def2-TZVP. For TSs the imaginary frequency is given. In addition, electronic energies (in hartrees) are quoted using, unless otherwise indicated, the default DLPNO-CCSD(T)/def2-TZVPP(ecp) level.

|                      |                                   |                   |                   |
|----------------------|-----------------------------------|-------------------|-------------------|
| <b>1<sup>B</sup></b> | E = -102.582081476221 au          |                   |                   |
|                      | ZPE = 0.04177933 au               |                   |                   |
|                      | G <sub>corr</sub> = 0.01807330 au |                   |                   |
| C                    | -0.11191044643341                 | 0.46639729322614  | -0.00073380806013 |
| C                    | 1.23427565549959                  | 0.46707202659094  | 0.02160881680278  |
| H                    | -0.92566216858447                 | -0.24384292185887 | -0.00039014259886 |
| H                    | 2.04821220830688                  | -0.24242336551970 | 0.04906718609662  |
| B                    | 0.56094812021935                  | 1.77074871915449  | -0.01454097430694 |
| H                    | 0.56077414099206                  | 2.94839776840700  | -0.03736605793348 |

|                       |                                   |                   |                   |
|-----------------------|-----------------------------------|-------------------|-------------------|
| <b>1<sup>Al</sup></b> | E = -319.776580353796 au          |                   |                   |
|                       | ZPE = 0.03606319 au               |                   |                   |
|                       | G <sub>corr</sub> = 0.01090857 au |                   |                   |
| C                     | -0.12309096995491                 | 0.31259316484217  | 0.00290506679181  |
| C                     | 1.24544895784992                  | 0.31323794088778  | 0.02561579891488  |
| H                     | -0.78663156170170                 | -0.54899421723522 | 0.00725376853558  |
| H                     | 1.90931775528607                  | -0.54769865797809 | 0.05209414244392  |
| Al                    | 0.56093008727606                  | 2.03696242113579  | -0.02044381583626 |
| H                     | 0.56066324124457                  | 3.60024886834756  | -0.04977994084993 |

|                       |                                   |                   |                   |
|-----------------------|-----------------------------------|-------------------|-------------------|
| <b>1<sup>Ga</sup></b> | E = -2001.232306587126 au         |                   |                   |
|                       | ZPE = 0.03535385 au               |                   |                   |
|                       | G <sub>corr</sub> = 0.00893323 au |                   |                   |
| C                     | -0.11662457061814                 | 0.28910816143441  | 0.00331589615433  |
| C                     | 1.23900452054553                  | 0.28971519022661  | 0.02583610357724  |
| H                     | -0.82867951686637                 | -0.53372785597887 | 0.00632589026088  |
| H                     | 1.95135667296059                  | -0.53243144275871 | 0.05255327073051  |
| Ga                    | 0.56095372132760                  | 2.06290418490378  | -0.02042472310225 |
| H                     | 0.56062668265078                  | 3.59078128217278  | -0.04996141762072 |

|                        |                                                      |  |  |
|------------------------|------------------------------------------------------|--|--|
| <b>1<sup>In*</sup></b> | E = -267.231457619510 au                             |  |  |
|                        | E = -266.913253182 au [CASSCF(6,6)/MRACPF/def2-SVPD] |  |  |
|                        | ZPE = 0.03345178 au                                  |  |  |

$G_{\text{corr}} = 0.00560013 \text{ au}$

|    |                   |                   |                   |
|----|-------------------|-------------------|-------------------|
| C  | -0.14962067686739 | 0.22891367097567  | 0.00324025923304  |
| C  | 1.17963899832784  | 0.17792521014688  | 0.02614643787168  |
| H  | -0.82425496573299 | -0.62935232648408 | 0.00894802786358  |
| H  | 1.96314055416247  | -0.57391946339259 | 0.05407678806407  |
| ln | 0.82848242912478  | 2.21054595205977  | -0.01868478554529 |
| H  | 0.17437266098530  | 3.75211795669432  | -0.05932372748706 |

**1<sup>Tl\*</sup>** E = -249.632634473190 au

ZPE = 0.03165075 au

$G_{\text{corr}} = 0.00131178 \text{ au}$

|    |                   |                   |                   |
|----|-------------------|-------------------|-------------------|
| C  | -0.01051095576705 | 0.02096002764612  | 0.07977972989978  |
| C  | 1.14750457680096  | -0.29917120520691 | 0.08311440431922  |
| H  | -1.02488617664198 | 0.34070307047558  | 0.07437130370805  |
| H  | 2.15731811204406  | -0.63227564176242 | 0.08905043188202  |
| Tl | 1.41315132339879  | 2.79997596071200  | -0.17000211993674 |
| H  | -0.51081787983476 | 2.93603878813557  | -0.14191074987231 |

**1<sup>C</sup>** E = -116.398803235302 au

ZPE = 0.05581697 au

$G_{\text{corr}} = 0.03187517 \text{ au}$

|   |                  |                   |                  |
|---|------------------|-------------------|------------------|
| C | 1.86704377958438 | -1.50077910912250 | 1.45358489549942 |
| C | 3.36721635819531 | -1.37790302148779 | 1.45302743170999 |
| C | 2.72419604939889 | -0.26295099792165 | 1.45224002670173 |
| H | 1.35040170210964 | -1.79934739339877 | 0.54238974427655 |
| H | 1.35092628697348 | -1.79771344465639 | 2.36561096767832 |
| H | 2.72945614885779 | 0.81222240989786  | 1.45127143933111 |
| H | 4.30093764488050 | -1.91087148331075 | 1.45323349480288 |

**1<sup>Si</sup>** E = -367.441840561261 au

ZPE = 0.04658363 au

$G_{\text{corr}} = 0.02136082 \text{ au}$

|    |                  |                   |                  |
|----|------------------|-------------------|------------------|
| C  | 3.48121315585138 | -1.33741043137068 | 1.45364718082077 |
| C  | 2.81601593686222 | -0.18517154337596 | 1.45145848441966 |
| H  | 3.08300251991876 | 0.86322985313610  | 1.44967458856938 |
| H  | 4.52274032756038 | -1.62991416532628 | 1.45437181858347 |
| Si | 1.68917917194463 | -1.60393497825800 | 1.45372383540273 |
| H  | 0.96516775407433 | -2.01753894086578 | 2.67414407137363 |
| H  | 0.96620769378830 | -2.02277540393939 | 0.23447245083035 |



**1<sup>Ge</sup>** E = -2153.978124181148 au  
 ZPE = 0.04436970 au  
 G<sub>corr</sub> = 0.01781850 au

|    |                  |                   |                  |
|----|------------------|-------------------|------------------|
| C  | 3.52469219041442 | -1.30592189334541 | 1.45368779711994 |
| C  | 2.86519195766482 | -0.16331888288164 | 1.45133406578101 |
| H  | 3.10186522378521 | 0.89302322304515  | 1.44930226768681 |
| H  | 4.55800911470969 | -1.62844549477169 | 1.45470614540399 |
| Ge | 1.63015809658425 | -1.63748209356681 | 1.45377081174596 |
| H  | 0.92132277957689 | -2.04302912487032 | 2.74896048318416 |
| H  | 0.92228719726469 | -2.04834134360927 | 0.15973085907812 |

**1<sup>Sn</sup>** E = -292.010339573505 au  
 ZPE = 0.04130559 au  
 G<sub>corr</sub> = 0.01352533 au

|    |                  |                   |                  |
|----|------------------|-------------------|------------------|
| C  | 3.60883922299819 | -1.25772530503299 | 1.45382182132178 |
| C  | 2.94919572496598 | -0.11488169222410 | 1.45105841940529 |
| H  | 3.22317219842184 | 0.93458986414983  | 1.44875452494755 |
| H  | 4.65498453489044 | -1.54393052374490 | 1.45506786311442 |
| Sn | 1.53625444542211 | -1.69164415794299 | 1.45385808579463 |
| H  | 0.77484620005513 | -2.12674275325932 | 2.90890298706189 |
| H  | 0.77623423324630 | -2.13318104194554 | 0.00002872835444 |

**1<sup>Pb\*</sup>** E = -270.558650246835 au  
 ZPE = 0.03823709 au  
 G<sub>corr</sub> = 0.00757307 au

|    |                  |                   |                  |
|----|------------------|-------------------|------------------|
| C  | 3.70642123668768 | -1.04668114553044 | 1.43681560412726 |
| C  | 3.35518865632941 | 0.10373212652914  | 1.46421663377336 |
| H  | 3.12823166498744 | 1.14293556509305  | 1.48868187438088 |
| H  | 4.01797441450439 | -2.06386086031412 | 1.41293403005530 |
| Pb | 0.76464365956564 | -1.22337874433388 | 1.42760793555643 |
| H  | 1.24362375382011 | -2.38942550307899 | 2.79161900886110 |
| H  | 1.30744317410526 | -2.45683704836473 | 0.14961734324561 |

**1<sup>N</sup>** E = -132.397516252899 au  
 ZPE = 0.04338520 au  
 G<sub>corr</sub> = 0.01942865 au

|   |                   |                   |                   |
|---|-------------------|-------------------|-------------------|
| C | -0.17792634338506 | 0.24249136300042  | -0.29389510082375 |
| C | 1.06113242286821  | -0.02354782467462 | -0.36393680672687 |
| H | -1.22800301389374 | 0.07112304597715  | -0.42857771710970 |
| H | 1.92675146723146  | -0.60747875279581 | -0.60856095613264 |
| N | 0.71698190139017  | 1.16298153723927  | 0.51509797018401  |
| H | 0.86812469578895  | 2.01185553125358  | -0.03875801939106 |

**1<sup>P</sup>** E = -418.685417516564 au  
 ZPE = 0.03844776 au  
 G<sub>corr</sub> = 0.01331884 au

|   |                   |                   |                   |
|---|-------------------|-------------------|-------------------|
| C | -0.20496171222566 | 0.16088010016102  | -0.25402686415296 |
| C | 1.05633028765661  | -0.11056130943616 | -0.32593836145074 |
| H | -1.18683195864658 | -0.12928550480846 | -0.58930158076198 |
| H | 1.79007045515649  | -0.76975277718835 | -0.75918856332947 |
| P | 0.76443634003677  | 1.30573407806731  | 0.81184078302035  |
| H | 0.94801771802236  | 2.40041031320462  | -0.10201604332519 |

**1<sup>As</sup>** E = -2312.245219181592 au  
 ZPE = 0.03673259 au  
 G<sub>corr</sub> = 0.01032560 au

|    |                   |                   |                   |
|----|-------------------|-------------------|-------------------|
| C  | -0.21295714576434 | 0.11490499977754  | -0.26694857438124 |
| C  | 1.04328330570080  | -0.15535674444312 | -0.33830578722472 |
| H  | -1.19296581795149 | -0.16361500615727 | -0.61854133338603 |
| H  | 1.77840233511935  | -0.80240342214903 | -0.78832051876174 |
| As | 0.78218590750682  | 1.36329559332317  | 0.91201118448736  |
| H  | 0.96911254538884  | 2.50059947964869  | -0.11852560073363 |

**1<sup>Sb</sup>** E = -317.377830937677 au  
 ZPE = 0.03503248 au  
 G<sub>corr</sub> = 0.00770270 au

|    |                   |                   |                   |
|----|-------------------|-------------------|-------------------|
| C  | -0.22653141315982 | 0.05554275210001  | -0.28208719842160 |
| C  | 1.02984311717281  | -0.21497141995898 | -0.35335111113291 |
| H  | -1.19044282091545 | -0.24082611982189 | -0.66670150702413 |
| H  | 1.73898921125031  | -0.87143033061100 | -0.83379158451022 |
| Sb | 0.80697668135818  | 1.43829664386362  | 1.04923463893375  |
| H  | 1.00822635429395  | 2.69081337442822  | -0.13193386784488 |

**1<sup>Bi</sup>** E = -291.736818748145 au  
 ZPE = 0.03401879 au  
 G<sub>corr</sub> = 0.00576423 au

|    |                   |                   |                   |
|----|-------------------|-------------------|-------------------|
| C  | -0.23260327247534 | 0.01435850652234  | -0.29753821013711 |
| C  | 1.01699090985678  | -0.25430348856188 | -0.36851988148050 |
| H  | -1.20287781698860 | -0.26012271067157 | -0.68112627728443 |
| H  | 1.74074802958943  | -0.89355253522220 | -0.84939977111236 |
| Bi | 0.81930123303258  | 1.47956380675544  | 1.11876487046327  |
| H  | 1.02550204698514  | 2.77148132117785  | -0.14081136044887 |

**1<sup>0\*</sup>** E = -152.234397343508 au  
 E = -151.978189782078 au [CASSCF(6,6)/MRACPF/def2-SVPD]  
 ZPE = 0.02856521 au  
 G<sub>corr</sub> = 0.00338652 au

|   |                   |                  |                  |
|---|-------------------|------------------|------------------|
| C | -0.16876074341669 | 0.36831172164484 | 0.00322103919356 |
| C | 1.08186885785998  | 0.58525644893826 | 0.00322265224104 |
| O | 0.57829609148528  | 1.86529647475980 | 0.00322331488164 |
| H | -1.20609363281931 | 0.12968610730920 | 0.00322330638143 |
| H | 2.09496742689076  | 0.21748224734791 | 0.00322368730232 |

**1<sup>0</sup>(C<sub>2v</sub>)** E = -152.235384171971 au  
 ZPE = 0.02879446 au  
 G<sub>corr</sub> = 0.00338652 au  
*v* = -133.17 cm<sup>-1</sup>

|   |                   |                  |                  |
|---|-------------------|------------------|------------------|
| C | -0.12595178787477 | 0.49679426908575 | 0.00322297882492 |
| C | 1.13387951334934  | 0.49292838093524 | 0.00322301571306 |
| O | 0.50800051021334  | 1.85398958075426 | 0.00322274062212 |
| H | -1.14342506690123 | 0.16598584060224 | 0.00322268995408 |
| H | 2.14931015121333  | 0.15589187862251 | 0.00322267488583 |

**1<sup>S</sup>** E = -474.893167668796 au  
 ZPE = 0.02891103 au  
 G<sub>corr</sub> = 0.00380176 au

|   |                   |                   |                  |
|---|-------------------|-------------------|------------------|
| C | -0.13147393853800 | 0.48875825381917  | 0.00322292546310 |
| C | 1.13931682797716  | 0.48491295709270  | 0.00322284757778 |
| S | 0.50922021157633  | 2.22962117903168  | 0.00322279643068 |
| H | -1.07965983034874 | -0.01402742696141 | 0.00322274934408 |
| H | 2.08441004933326  | -0.02367501298214 | 0.00322278118436 |

**1<sup>Se</sup>** E = -2477.288891647312 au  
 ZPE = 0.02832749 au  
 G<sub>corr</sub> = 0.00192120 au

|    |                   |                   |                  |
|----|-------------------|-------------------|------------------|
| C  | -0.13033311691047 | 0.46077157592779  | 0.00322184621589 |
| C  | 1.13801024153964  | 0.45692731805563  | 0.00322179685741 |
| Se | 0.50961688099455  | 2.36394570181158  | 0.00322328431086 |
| H  | -1.07289874522778 | -0.05321833338200 | 0.00322357623554 |
| H  | 2.07741805960407  | -0.06283631241300 | 0.00322359638029 |

**1<sup>Te</sup>** E = -344.619241498200 au  
 ZPE = 0.02781396 au  
 G<sub>corr</sub> = 0.00055766 au

|    |                   |                   |                  |
|----|-------------------|-------------------|------------------|
| C  | -0.13003837805628 | 0.43088299070273  | 0.00322284405750 |
| C  | 1.13745297323640  | 0.42703434364600  | 0.00322287436900 |
| Te | 0.51025302560422  | 2.54234181899867  | 0.00322285740351 |
| H  | -1.05720365665606 | -0.11263908329409 | 0.00322276838343 |
| H  | 2.06134935587173  | -0.12203012005330 | 0.00322275578655 |

**1<sup>Po</sup>** E = -314.339731777111 au  
 ZPE = 0.02745950 au  
 G<sub>corr</sub> = -0.00062366 au

|    |                   |                   |                  |
|----|-------------------|-------------------|------------------|
| C  | -0.12680158251231 | 0.39837061425890  | 0.00322317530870 |
| C  | 1.13403430281097  | 0.39442833401429  | 0.00322339126551 |
| Po | 0.51046838528977  | 2.63336673202051  | 0.00322270127730 |
| H  | -1.06443857322698 | -0.12554302041392 | 0.00322246093980 |
| H  | 2.06855078763856  | -0.13503270987979 | 0.00322237120869 |

**2<sup>N</sup>** E = -132.452255412637 au  
 ZPE = 0.04479942 au  
 G<sub>corr</sub> = 0.02100420 au

|   |                  |                  |                   |
|---|------------------|------------------|-------------------|
| C | 1.03481393975417 | 1.47287790840700 | -0.63468299774773 |
| C | 2.13374629681094 | 0.99650741640888 | 0.17739135601863  |
| H | 0.24946157466928 | 1.30953622034560 | -1.36044065411421 |
| H | 3.12250741144054 | 0.87008619011323 | -0.24951286651923 |
| H | 1.94676293193844 | 0.47557246751895 | 1.10996477280139  |
| N | 1.50765434538661 | 2.40507659720635 | 0.04342237956115  |

**2<sup>P\*</sup>** E = -418.696508729263 au  
 E = -418.425217363244 au [CASSCF(8,6)/MRACPF/def2-SVPD]  
 ZPE = 0.04158183 au  
 G<sub>corr</sub> = 0.01648698 au

|   |                  |                  |                   |
|---|------------------|------------------|-------------------|
| C | 1.01244807341974 | 1.49874910547585 | -0.64708467609665 |
| C | 2.13114738197466 | 0.99148167089641 | 0.17369218711902  |
| H | 0.31207364324383 | 1.10365033545254 | -1.36568643884491 |
| H | 3.08023394914555 | 0.76051263462227 | -0.30338408584318 |
| H | 1.91763954570488 | 0.37142080108080 | 1.04074470637057  |
| P | 1.54140390651134 | 2.80384225247212 | 0.18786029729515  |

**2<sup>As\*</sup>** E = -2312.253356272316 au

E = -2311.81745422462 au [CASSCF(8,6)/MRACPF/def2-SVPD]  
 ZPE = 0.04050448 au  
 G<sub>corr</sub> = 0.01415139 au

|    |                  |                  |                   |
|----|------------------|------------------|-------------------|
| C  | 1.01976035054711 | 1.48034694670512 | -0.64640136391504 |
| C  | 2.12553966580225 | 0.95826803931169 | 0.15929851192643  |
| H  | 0.31998225503893 | 1.08044269748108 | -1.36500134585186 |
| H  | 3.07834576886473 | 0.73598351405513 | -0.31328872888010 |
| H  | 1.91416197351969 | 0.34560982499642 | 1.03154066976756  |
| As | 1.53715648622729 | 2.92900577745056 | 0.21999424695302  |

**2<sup>Sb\*</sup>** E = -317.379353178921 au  
 E = -317.035305908757 au [CASSCF(8,6)/MRACPF/def2-SVPD]  
 ZPE = 0.03912539 au  
 G<sub>corr</sub> = 0.01179627 au

|    |                  |                  |                   |
|----|------------------|------------------|-------------------|
| C  | 1.02109447523054 | 1.45963119557854 | -0.64993853532623 |
| C  | 2.11854450124462 | 0.92364453930302 | 0.14345459561598  |
| H  | 0.33611340630008 | 1.02931293024868 | -1.36731635256689 |
| H  | 3.06882079349821 | 0.69464520065206 | -0.33230152254381 |
| H  | 1.90651445600869 | 0.30499941912605 | 1.01187883566456  |
| Sb | 1.54385886771785 | 3.11742351509163 | 0.28036496915639  |

**2<sup>Bi\*</sup>** E = -291.740202592561 au  
 E = -291.32937433135 au [CASSCF(8,6)/MRACPF/def2-SVPD]  
 ZPE = 0.03807973 au  
 G<sub>corr</sub> = 0.00943765 au

|    |                  |                  |                   |
|----|------------------|------------------|-------------------|
| C  | 1.02583007201814 | 1.44180694499991 | -0.64811658863832 |
| C  | 2.11381249109925 | 0.89731408214512 | 0.13214096405543  |
| H  | 0.34051279524317 | 1.01824265427787 | -1.37012168650612 |
| H  | 3.06898673458904 | 0.67784770044399 | -0.33842579103061 |
| H  | 1.90753694297870 | 0.28932173870001 | 1.00937329792957  |
| Bi | 1.53826746407169 | 3.20512367943309 | 0.30129179419007  |

**3<sup>B</sup>** E = -181.078398231603 au  
 ZPE = 0.09763374 au  
 G<sub>corr</sub> = 0.06858279 au

|   |                   |                  |                   |
|---|-------------------|------------------|-------------------|
| C | 2.40419483452755  | 2.42327227593686 | -0.36123123989168 |
| H | 2.98987628979905  | 1.56434723793492 | -0.67384253979683 |
| H | 2.96480982833797  | 3.29610797777745 | -0.04287938580743 |
| C | 1.06447381162435  | 2.43038608398239 | -0.35925815746323 |
| H | 0.55816679639598  | 1.52418003973644 | -0.68965781635885 |
| C | -1.28493338092460 | 3.70126621878966 | 0.10048727376542  |

|   |                   |                  |                   |
|---|-------------------|------------------|-------------------|
| C | -1.96550948244417 | 4.78561872430058 | 0.49587566759631  |
| H | -1.86386239530407 | 2.83470017427933 | -0.21678864255164 |
| H | -1.44494818800271 | 5.67983044228891 | 0.82268836981057  |
| H | -3.05014692795076 | 4.82866991312919 | 0.51103809751240  |
| B | 0.25572497055594  | 3.66371454452259 | 0.08800080319374  |
| H | 0.85321801338547  | 4.63958964732166 | 0.44305724999122  |

**3<sup>Al</sup>** E = -398.287067103634 au  
 ZPE = 0.09024841 au  
 G<sub>corr</sub> = 0.05939003 au

|    |                   |                  |                   |
|----|-------------------|------------------|-------------------|
| C  | 2.66907811661605  | 2.21987874900644 | -0.43822773586084 |
| H  | 3.27704552680778  | 1.37428523518002 | -0.75172879448442 |
| H  | 3.22676119866236  | 3.09683077819248 | -0.11913830407778 |
| C  | 1.33091140268192  | 2.19858893067814 | -0.43959530976656 |
| H  | 0.86235555826334  | 1.27430809968726 | -0.77705488681140 |
| C  | -1.63067114818137 | 3.80129540147389 | 0.13933829970880  |
| C  | -2.28716018454514 | 4.89908192606241 | 0.53371939345717  |
| H  | -2.24480172234018 | 2.95570313916918 | -0.16989468428834 |
| H  | -1.76227597003844 | 5.79358716751188 | 0.85945270635380  |
| H  | -3.37252888328273 | 4.96679095059358 | 0.55369268111337  |
| Al | 0.31093502770852  | 3.75123206723666 | 0.12715094546777  |
| H  | 1.10141524764788  | 5.04010083520803 | 0.59977536918841  |

**3<sup>Ga</sup>** E = -2079.747945523686 au  
 ZPE = 0.08994660 au  
 G<sub>corr</sub> = 0.05835939 au

|    |                   |                  |                   |
|----|-------------------|------------------|-------------------|
| C  | 2.68369966251693  | 2.20711167437878 | -0.45006695658854 |
| H  | 3.27311462954541  | 1.35294948689372 | -0.77462660463571 |
| H  | 3.25527488180870  | 3.07704747039180 | -0.13916909441725 |
| C  | 1.34877789752304  | 2.19789211800370 | -0.43162610820119 |
| H  | 0.84797040871565  | 1.28900071677916 | -0.75903863183872 |
| C  | -1.63760730646667 | 3.81591568829031 | 0.14837557096534  |
| C  | -2.30854191307850 | 4.90548474958607 | 0.53001397098240  |
| H  | -2.21995021625691 | 2.95290833590140 | -0.16835865387535 |
| H  | -1.79922775450269 | 5.80697276633442 | 0.85856745225152  |
| H  | -3.39480451519115 | 4.95493236924607 | 0.53449362592463  |
| Ga | 0.32299029109535  | 3.76609405934286 | 0.14681658021226  |
| H  | 1.10936810429084  | 5.04537384485167 | 0.62210852922060  |

**3<sup>In</sup>** E = -345.747663869996 au  
 E = -345.292307955471 au [CASSCF(6,6)/MRACPF/def2-SVPD]  
 ZPE = 0.088177790au

$G_{\text{corr}} = 0.05550770$  au

|    |                   |                  |                   |
|----|-------------------|------------------|-------------------|
| C  | 2.81610097669133  | 2.10122346307007 | -0.49070809509700 |
| H  | 3.39272363755486  | 1.23895619783307 | -0.81948701660638 |
| H  | 3.40324934621498  | 2.96216782623892 | -0.18422201439685 |
| C  | 1.48279807238448  | 2.10251114070899 | -0.46507133882907 |
| H  | 0.97153949486624  | 1.19879730616910 | -0.78943961352459 |
| C  | -1.79273781575351 | 3.87628513575037 | 0.17019877118814  |
| C  | -2.47259781655576 | 4.95983971555565 | 0.54779627354755  |
| H  | -2.36514877412539 | 3.00790275684488 | -0.14857989364533 |
| H  | -1.97871333606964 | 5.86871793807448 | 0.87920987672045  |
| H  | -3.56017661384195 | 4.99617758976422 | 0.54591980483604  |
| ln | 0.35924605111747  | 3.82453475977620 | 0.17228674739227  |
| H  | 1.22478094751689  | 5.23456945021399 | 0.69958617841476  |

**3<sup>C</sup>** E = -194.929925984928 au

ZPE = 0.11306921 au

$G_{\text{corr}} = 0.08406477$  au

|   |                   |                   |                   |
|---|-------------------|-------------------|-------------------|
| C | -2.54641206957776 | -0.07680558224637 | -0.81946558120829 |
| C | -2.21807386143828 | -0.18579260854419 | 0.46063286690815  |
| C | -0.82943550343075 | -0.45287995021608 | 0.97113026039523  |
| H | -0.14162434571924 | -0.58651812228651 | 0.13318154198908  |
| C | -0.33264348665355 | 0.64040374109966  | 1.87569974945566  |
| C | 0.75943898665382  | 1.36203819289727  | 1.66357289500391  |
| H | -1.80567263927121 | -0.18109877935432 | -1.60475339120508 |
| H | -3.56475330353127 | 0.11932846959989  | -1.13017480513039 |
| H | -2.98816222193389 | -0.06872261311600 | 1.21936372498264  |
| H | -0.93832848016502 | 0.83914162704316  | 2.75666310380281  |
| H | 1.38610217558222  | 1.19909665973863  | 0.79352905961580  |
| H | 1.06821353923068  | 2.14026846802876  | 2.34994612553646  |
| H | -0.83940261974575 | -1.39550005264391 | 1.53467301985403  |

**3<sup>Si</sup>** E = -445.952046717619 au

ZPE = 0.10164456 au

$G_{\text{corr}} = 0.07097764$  au

|   |                   |                   |                   |
|---|-------------------|-------------------|-------------------|
| C | -2.80055265846305 | -0.07270300304693 | -0.94137169920858 |
| C | -2.45232948818175 | -0.30623266093401 | 0.32277525862275  |
| C | -0.12092470683034 | 0.71185301804415  | 2.07355618532567  |
| C | 0.89789840036287  | 1.53618275953111  | 1.83666786397926  |
| H | -2.06499355789520 | -0.03667639781637 | -1.73873107306640 |
| H | -3.83137398598643 | 0.09128209232233  | -1.23918274710420 |
| H | -3.24215694892508 | -0.32960883711753 | 1.07172152713640  |
| H | -0.64640950514159 | 0.81235523716500  | 3.02179643855168  |
| H | 1.46536464698700  | 1.49162743784754  | 0.91258787476689  |

|    |                   |                   |                   |
|----|-------------------|-------------------|-------------------|
| H  | 1.21286028303342  | 2.29042295177551  | 2.55097414949899  |
| Si | -0.69196410595006 | -0.59235979378744 | 0.86892998489971  |
| H  | -0.59908346875509 | -1.92531223507643 | 1.52084126907926  |
| H  | 0.18973033574533  | -0.56026985890694 | -0.32421607248146 |

**3<sup>Ge</sup>** E = -2232.495275662887 au  
ZPE = 0.09968239 au  
G<sub>corr</sub> = 0.06787856 au

|    |                   |                   |                   |
|----|-------------------|-------------------|-------------------|
| C  | -2.85521806978563 | -0.06325486999967 | -0.96031735793882 |
| C  | -2.50460648310169 | -0.33206079334665 | 0.29295987175403  |
| C  | -0.07791333028049 | 0.73111051531865  | 2.11914097918619  |
| C  | 0.91492873579271  | 1.57896249634310  | 1.87154283520153  |
| H  | -2.12546059862621 | -0.00075031201795 | -1.76124308572406 |
| H  | -3.88905338122055 | 0.10621933914363  | -1.24530714354211 |
| H  | -3.27977988599268 | -0.38321754724643 | 1.05351065978897  |
| H  | -0.60166229711060 | 0.80085235728196  | 3.06922502536736  |
| H  | 1.47207843819758  | 1.55592850433187  | 0.94052124026120  |
| H  | 1.21802517579829  | 2.33644260269209  | 2.58791353363167  |
| Ge | -0.65844182493983 | -0.63290605873909 | 0.85011066412814  |
| H  | -0.54809423187126 | -2.02425662240337 | 1.51107115768191  |
| H  | 0.25126299314039  | -0.56250890135816 | -0.39277941979602 |

**3<sup>Sn</sup>** E = -370.524753188627 au  
ZPE = 0.09651669 au  
G<sub>corr</sub> = 0.06349551 au

|    |                   |                   |                   |
|----|-------------------|-------------------|-------------------|
| C  | -2.99736989164554 | -0.07463054667329 | -1.01872732139035 |
| C  | -2.64128752436871 | -0.37211111186981 | 0.22657331560953  |
| C  | 0.02885717031231  | 0.78003441094920  | 2.23574850617608  |
| C  | 0.97930057144564  | 1.67226389177955  | 1.97775517638312  |
| H  | -2.27416832920996 | 0.02063595747949  | -1.82271044987137 |
| H  | -4.03500452720735 | 0.08831042566366  | -1.29751286832223 |
| H  | -3.41436896188181 | -0.45457404017944 | 0.98595239437096  |
| H  | -0.45445623711672 | 0.79746910200260  | 3.20899054994829  |
| H  | 1.50047383918685  | 1.70703318640575  | 1.02619344752932  |
| H  | 1.28512779562621  | 2.41564176383440  | 2.70909111314621  |
| Sn | -0.60301257604098 | -0.68884335491556 | 0.80863225930426  |
| H  | -0.43501998925577 | -2.25794360887392 | 1.48641957707503  |
| H  | 0.37699390015588  | -0.52272536560264 | -0.59005673995889 |

**3<sup>N</sup>** E = -210.965067349400 au  
ZPE = 0.10168069 au  
G<sub>corr</sub> = 0.07311990 au



|   |                   |                   |                  |
|---|-------------------|-------------------|------------------|
| C | 0.98675746502561  | -1.03454206374964 | 1.45979502706591 |
| H | 1.32812916353752  | -2.05787306420403 | 1.46737002406874 |
| H | -0.06250103828821 | -0.85558452642333 | 1.25935788724015 |
| C | 1.84640913358232  | -0.04003085583301 | 1.69287140753692 |
| H | 2.89211148083159  | -0.24864288832011 | 1.88939694119932 |
| N | 1.54368194772229  | 1.30450068622711  | 1.71496863307261 |
| H | 0.58663893480434  | 1.57109863272912  | 1.54251243381101 |
| C | 2.45599597741152  | 2.31175177433899  | 1.94548487036831 |
| C | 2.19269277805249  | 3.62047070350761  | 1.96445264149996 |
| H | 2.98354000585743  | 4.32917413036673  | 2.15437985355574 |
| H | 1.19692533926385  | 4.01151969797515  | 1.79510638501193 |
| H | 3.46247607219922  | 1.94820685338539  | 2.11991085556939 |

**3<sup>P</sup>** E = -497.189772615128 au  
ZPE = 0.09433612 au  
G<sub>corr</sub> = 0.06405147 au

|   |                   |                   |                   |
|---|-------------------|-------------------|-------------------|
| C | 0.94786030883073  | -1.08496396166422 | 1.97065359209497  |
| H | 1.31972419949421  | -2.07209339265616 | 2.22207411684573  |
| H | -0.09311695103563 | -0.88277120547105 | 2.19809403364935  |
| C | 1.72532003822454  | -0.16566783864749 | 1.40905455477943  |
| H | 2.76628104733093  | -0.39826297146450 | 1.19839243535174  |
| P | 1.08788491411730  | 1.50083947784919  | 0.99768243736175  |
| H | 1.57971860376890  | 1.52765430808234  | -0.33773393111847 |
| C | 2.41993977352055  | 2.52965303411432  | 1.71870482284035  |
| C | 2.14695429112598  | 3.58051537665357  | 2.48458504787388  |
| H | 2.93140510001940  | 4.19136196565572  | 2.91761542937033  |
| H | 1.12542307095654  | 3.87014044123464  | 2.70565166294247  |
| H | 3.45546286364651  | 2.26364384631361  | 1.52083275800843  |

**3<sup>As</sup>** E = -2390.745070386180 au  
ZPE = 0.09225295 au  
G<sub>corr</sub> = 0.06072936 au

|    |                   |                   |                   |
|----|-------------------|-------------------|-------------------|
| C  | 0.96660974159445  | -1.17067137158354 | 1.98640907749322  |
| H  | 1.37839199113560  | -2.14532767727155 | 2.22687037893473  |
| H  | -0.07344417526060 | -1.00785747521993 | 2.24857094509276  |
| C  | 1.69583658941954  | -0.22934937452821 | 1.40190915649858  |
| H  | 2.73601435850394  | -0.41849248137114 | 1.15354628490194  |
| As | 0.95056896908137  | 1.53639389817394  | 0.98944479508128  |
| H  | 1.49520023840030  | 1.56170203909953  | -0.44280506439246 |
| C  | 2.42347506362306  | 2.59807879257297  | 1.73000871428412  |
| C  | 2.19764771553099  | 3.64413625364785  | 2.51422160107839  |
| H  | 3.00942536362753  | 4.22909704461330  | 2.93410304456958  |
| H  | 1.19223106486005  | 3.96139331379059  | 2.77016906698954  |
| H  | 3.44090033948373  | 2.30094611807618  | 1.49315895946827  |

**3<sup>Sb</sup>** E = -395.869163598903 au  
 ZPE = 0.09007584 au  
 G<sub>corr</sub> = 0.05743155 au

|    |                   |                   |                   |
|----|-------------------|-------------------|-------------------|
| C  | 0.98054189750172  | -1.29778496410922 | 2.01816309708753  |
| H  | 1.43167417691859  | -2.25824463926271 | 2.25040456269037  |
| H  | -0.05269022922400 | -1.17290276278826 | 2.32650552651009  |
| C  | 1.65436468536118  | -0.33873622123833 | 1.39518985976787  |
| H  | 2.68789337062212  | -0.50598252020514 | 1.10571985134816  |
| Sb | 0.78010032488027  | 1.58187651324576  | 0.95720514861864  |
| H  | 1.40186961174190  | 1.60161702687142  | -0.64874316942979 |
| C  | 2.43777603240288  | 2.71891873493552  | 1.73572171193709  |
| C  | 2.26549704821305  | 3.73908461172654  | 2.56765382404646  |
| H  | 3.10372002680524  | 4.30180555597328  | 2.96853532240968  |
| H  | 1.28094087572130  | 4.06332432865649  | 2.89019892381246  |
| H  | 3.44116943905570  | 2.42707341619463  | 1.43905230120138  |

**3<sup>Bi</sup>** E = -370.220572137594 au  
 ZPE = 0.08876986 au  
 G<sub>corr</sub> = 0.05510010 au

|    |                   |                   |                   |
|----|-------------------|-------------------|-------------------|
| C  | 0.98490701522934  | -1.35338538607844 | 2.02481915136942  |
| H  | 1.45225633487051  | -2.30879844002878 | 2.24973756650132  |
| H  | -0.04660599624411 | -1.24864314728811 | 2.34777471927961  |
| C  | 1.63712624508007  | -0.38453248060590 | 1.39628639966312  |
| H  | 2.66914784981422  | -0.52915332873059 | 1.09108351705285  |
| Bi | 0.68596273741411  | 1.61089965366749  | 0.95526547860596  |
| H  | 1.32972677914019  | 1.62146114816634  | -0.73224047289609 |
| C  | 2.45093942315219  | 2.78099049131769  | 1.72833303918177  |
| C  | 2.30939978745906  | 3.76931440230033  | 2.60171191085800  |
| H  | 3.16187669086245  | 4.32198824029707  | 2.98846620501324  |
| H  | 1.33947543613509  | 4.08088982120689  | 2.97820180841373  |
| H  | 3.43864495708685  | 2.49901810577600  | 1.37616763695704  |

**3<sup>O</sup>** E = -230.809390657099 au  
 E = -230.41145989472 au [CASSCF(6,6)/MRACPF/def2-SVPD]  
 ZPE = 0.08879633 au  
 G<sub>corr</sub> = 0.06016918 au

|   |                   |                   |                  |
|---|-------------------|-------------------|------------------|
| C | 0.94386128047325  | -0.96958705976819 | 1.61160729402810 |
| H | 1.29167437805025  | -1.98554085281176 | 1.50282894035687 |
| H | -0.12081064558318 | -0.78224472719105 | 1.62919191224570 |
| C | 1.82384773946367  | 0.01428843488731  | 1.72023107048584 |
| H | 2.89725075864048  | -0.14864867080323 | 1.70636704894347 |

|   |                  |                  |                  |
|---|------------------|------------------|------------------|
| C | 2.40769821759071 | 2.26958955704704 | 1.97135132744385 |
| C | 2.11491519657407 | 3.55536496407581 | 2.09483082933037 |
| H | 1.09171604656287 | 3.90433061510602 | 2.11164865134494 |
| H | 3.42639477009860 | 1.89442784739158 | 1.95392174682808 |
| O | 1.43870676946395 | 1.31586773012716 | 1.85771877846571 |
| H | 2.91241844866531 | 4.27732356193930 | 2.18233178052706 |

**3<sup>S</sup>** E = -553.419919037401 au  
ZPE = 0.08516251 au  
G<sub>corr</sub> = 0.05485164 au

|   |                   |                   |                  |
|---|-------------------|-------------------|------------------|
| C | 0.99023330814283  | -1.26839925212112 | 1.61677570912071 |
| H | 1.49882018274799  | -2.21322309767550 | 1.48196137624903 |
| H | -0.08437837133470 | -1.29576508793037 | 1.74647144903797 |
| C | 1.67676501328958  | -0.13034184726959 | 1.61032142164479 |
| H | 2.75302652950421  | -0.12461466425381 | 1.47904711740198 |
| C | 2.33780570145435  | 2.47068492926449  | 2.05375482252005 |
| C | 2.29109857650027  | 3.79780200297334  | 2.10953407601341 |
| H | 1.37443122526448  | 4.35286376444053  | 1.95437680814953 |
| H | 3.26565149094007  | 1.93420426073709  | 2.21621615541242 |
| S | 0.93818225253131  | 1.45540721741541  | 1.75230964071798 |
| H | 3.18603705095958  | 4.36655317441952  | 2.32126080373212 |

**3<sup>Se</sup>** E = -2555.804304186445 au  
ZPE = 0.08386590 au  
G<sub>corr</sub> = 0.05169881 au

|    |                   |                   |                  |
|----|-------------------|-------------------|------------------|
| C  | 0.99950369207126  | -1.36258713255009 | 1.58178778986285 |
| H  | 1.55178522511005  | -2.28381490858831 | 1.44672591833707 |
| H  | -0.07721894563793 | -1.44295054684306 | 1.66666154287376 |
| C  | 1.63647366376877  | -0.20012950113502 | 1.63353957375664 |
| H  | 2.71484592303972  | -0.13767104278169 | 1.54531965212505 |
| C  | 2.33577910790006  | 2.55024773246091  | 2.07832760788524 |
| C  | 2.34156879272376  | 3.87645442187615  | 2.10177593141268 |
| H  | 1.44611705441976  | 4.46774531335142  | 1.95558283315124 |
| H  | 3.24150235310378  | 1.97424839013333  | 2.22796488169907 |
| Se | 0.77335517148645  | 1.48774456615018  | 1.82901460438601 |
| H  | 3.26396092201430  | 4.41588410792618  | 2.27532904451037 |

**3<sup>Te</sup>** E = -423.121865330448 au  
ZPE = 0.08294766 au  
G<sub>corr</sub> = 0.05146784 au

|   |                  |                   |                  |
|---|------------------|-------------------|------------------|
| C | 0.99952530024462 | -1.42830160450882 | 1.72722877264346 |
| H | 1.52759930717342 | -2.37371361397898 | 1.78728657778055 |

|    |                   |                   |                  |
|----|-------------------|-------------------|------------------|
| H  | -0.06877157249389 | -1.45707961584501 | 1.90550604340456 |
| C  | 1.64763201479456  | -0.30553399085275 | 1.44756214748104 |
| H  | 2.71925939965413  | -0.30103195897515 | 1.27898070025959 |
| C  | 2.36701472517741  | 2.65752434649623  | 1.92162222684534 |
| C  | 2.34396374403055  | 3.93677715507248  | 2.27058170606328 |
| H  | 1.44476022515038  | 4.54022472115316  | 2.23090271209450 |
| H  | 3.28021486257978  | 2.07501568199071  | 1.98052474447421 |
| Te | 0.72241623730276  | 1.56885910802409  | 1.17557691076972 |
| H  | 3.24405871638625  | 4.43243117142402  | 2.61625683818371 |

**3<sup>Po</sup>** E = -392.833776529030 au  
ZPE = 0.08255021 au  
G<sub>corr</sub> = 0.04932501 au

|    |                  |                   |                  |
|----|------------------|-------------------|------------------|
| C  | 1.08060296348562 | -1.50537990402885 | 1.60288846619737 |
| H  | 1.63141931892059 | -2.39313695591450 | 1.30695738781876 |
| H  | 0.13602994344768 | -1.67103390871020 | 2.10833242970933 |
| C  | 1.55418075408888 | -0.29375101459021 | 1.34991024572304 |
| H  | 2.50424389704462 | -0.14315297747621 | 0.85059559803029 |
| C  | 2.26726968107076 | 2.68785164354636  | 2.38498119703191 |
| C  | 2.48672852327018 | 3.95465858116237  | 2.06462100094388 |
| H  | 1.82039181263823 | 4.51880648332441  | 1.42220291409935 |
| H  | 2.94492051841800 | 2.13230615245982  | 3.02290124464103 |
| Po | 0.44458767870543 | 1.57492048285570  | 1.78730187216331 |
| H  | 3.35729786890998 | 4.48308281737129  | 2.44133702364168 |

**4<sup>B</sup>** E = -168.432616101051 au  
ZPE = 0.10168855 au  
G<sub>corr</sub> = 0.07107503 au

|   |                   |                  |                   |
|---|-------------------|------------------|-------------------|
| C | 2.45507116855023  | 2.39445242570652 | -0.45860055030942 |
| H | 2.95688810512955  | 3.35212448174567 | -0.32561081019476 |
| C | 1.11704070397972  | 2.37500132124497 | -0.25458611668786 |
| H | 0.61506173320720  | 1.41560047621762 | -0.38730916561071 |
| B | 0.28480550084264  | 3.64654488255976 | 0.08558169480331  |
| H | 0.89342718044325  | 4.63795030982370 | 0.36938228558193  |
| B | 3.24938606715277  | 1.14558693962105 | -0.90379297013982 |
| H | 4.40496072759847  | 1.20998876131264 | -1.19122414489473 |
| H | 2.68769676616133  | 0.09432817120664 | -0.96595389397156 |
| C | -1.27221435965075 | 3.66592196054733 | 0.10304163460644  |
| H | -1.75271639460624 | 2.80803391538831 | -0.37116359403590 |
| H | -1.69158535860168 | 4.58978183883253 | -0.30423238624709 |
| H | -1.57491163020649 | 3.66249278579320 | 1.16225197710018  |

**4<sup>Al</sup>** E = -602.863432105516 au  
 ZPE = 0.08681485 au  
 G<sub>corr</sub> = 0.05296906 au

|    |                   |                   |                   |
|----|-------------------|-------------------|-------------------|
| C  | 2.58788960101943  | 2.39757317656764  | -0.56185253815956 |
| H  | 3.03514070756042  | 3.39073605509347  | -0.47206689884688 |
| C  | 1.25058865586774  | 2.31015586377423  | -0.37598673725026 |
| H  | 0.80517617428282  | 1.31566896018487  | -0.46638456740210 |
| Al | 0.17353981080503  | 3.89079160855878  | 0.03485898755383  |
| H  | 0.97738353203699  | 5.25397386847370  | 0.14420358797229  |
| Al | 3.65956271485132  | 0.82257373850741  | -0.97684655702306 |
| H  | 5.22304328033866  | 0.90610344924355  | -1.21676934663511 |
| H  | 2.89322601881220  | -0.55990022461901 | -1.06707264011190 |
| C  | -1.76058423463924 | 3.82101242439340  | 0.32198489968099  |
| H  | -2.21113766775843 | 2.89105299363872  | -0.03251677678385 |
| H  | -2.27367322790674 | 4.65523389578156  | -0.16509184753799 |
| H  | -1.98724515527023 | 3.90283246040157  | 1.39132439454361  |

**4<sup>Ga</sup>** E = -3965.789242506538 au  
 ZPE = 0.08655185 au  
 G<sub>corr</sub> = 0.05096466 au

|    |                   |                   |                   |
|----|-------------------|-------------------|-------------------|
| C  | 2.59525083470497  | 2.39585916513977  | -0.55481466459655 |
| H  | 3.07278875945238  | 3.37079873271670  | -0.45381550973993 |
| C  | 1.26385998328988  | 2.32176121864453  | -0.38088458560785 |
| H  | 0.78900574580084  | 1.34484067887777  | -0.48314464059363 |
| Ga | 0.16919926533028  | 3.91188700041940  | 0.04974804634878  |
| H  | 0.96406055035178  | 5.26926106496848  | 0.18361797212456  |
| Ga | 3.68009573283633  | 0.80822177245231  | -0.98243830964718 |
| H  | 5.23739969280416  | 0.89124925880548  | -1.18925500531466 |
| H  | 2.91135610298935  | -0.55984742149123 | -1.10934995433459 |
| C  | -1.79086173031546 | 3.81687577548550  | 0.31849701464736  |
| H  | -2.20694193787444 | 2.86836151930703  | -0.02173340734556 |
| H  | -2.29499740461766 | 4.63350373328403  | -0.20175742936917 |
| H  | -2.01730538475245 | 3.92503577139011  | 1.38311443342842  |

**4<sup>In</sup>** E = -497.79653037723 au  
 E = -497.21362811637 au [CASSCF(6,6)/MRACPF/def2-SVPD]  
 ZPE = 0.08293524 au  
 G<sub>corr</sub> = 0.04512228 au

|    |                  |                  |                   |
|----|------------------|------------------|-------------------|
| C  | 2.66650451180803 | 2.38590677232668 | -0.56557183199572 |
| H  | 3.14305638674613 | 3.36045875481395 | -0.46439555739593 |
| C  | 1.34018507603008 | 2.29259350460906 | -0.39895911781249 |
| H  | 0.86672247987260 | 1.31604362316321 | -0.50113444584477 |
| In | 0.11679362721258 | 4.02546559622933 | 0.07313094706820  |

|    |                   |                   |                   |
|----|-------------------|-------------------|-------------------|
| H  | 0.99451307353977  | 5.52444872991939  | 0.20766140633811  |
| ln | 3.88164480135726  | 0.65734786992146  | -1.03441973608292 |
| H  | 5.59800228309975  | 0.75329389465334  | -1.26702588787823 |
| H  | 3.02328665648715  | -0.84743576834750 | -1.16561158513946 |
| C  | -2.03555309514355 | 3.89431267947671  | 0.37143805515571  |
| H  | -2.42710293635211 | 2.94755793092768  | 0.00167885112560  |
| H  | -2.53874854027341 | 4.71708431012874  | -0.13691615036153 |
| H  | -2.25639411438431 | 3.97073037217779  | 1.43790901282344  |

4<sup>C</sup> E = -196.166476926203 au  
ZPE = 0.13611422 au  
G<sub>corr</sub> = 0.10646843 au

|   |                   |                   |                  |
|---|-------------------|-------------------|------------------|
| C | -0.92622433607999 | 1.16320331058354  | 1.82955148474054 |
| C | 0.54858151585156  | 0.94018127140251  | 1.95373551514232 |
| C | 1.45161236123125  | 1.88622928682714  | 2.18806404879718 |
| C | 2.92982565545045  | 1.66619229876430  | 2.29660309736656 |
| C | 3.71896402733727  | 2.41575030213283  | 1.21723346417812 |
| H | 4.79372012561193  | 2.26573285251687  | 1.33890829617233 |
| H | 3.52389423168677  | 3.48988681655024  | 1.26361325516296 |
| H | 3.43625886709997  | 2.07032264439392  | 0.22087277284292 |
| H | 3.27547378231785  | 2.00031425466117  | 3.28174699046420 |
| H | 3.14492319160196  | 0.59576814369122  | 2.23708346262150 |
| H | 1.11460987874412  | 2.91653723889797  | 2.29627177942270 |
| H | 0.89018335616447  | -0.08721817427905 | 1.84170726331649 |
| H | -1.18022730879180 | 2.21891690466976  | 1.93863374839190 |
| H | -1.29710271488446 | 0.82268892369563  | 0.85798777969269 |
| H | -1.47687989334140 | 0.60035000549186  | 2.58960352168753 |

4<sup>Si</sup> E = -698.202610829344 au  
ZPE = 0.11099999 au  
G<sub>corr</sub> = 0.07809853 au

|    |                   |                  |                  |
|----|-------------------|------------------|------------------|
| C  | 0.32295677014913  | 1.00125292076761 | 2.19700278938241 |
| C  | 1.26000082328486  | 1.50326386156051 | 1.38213441765215 |
| C  | 3.99145973988915  | 2.85895378275469 | 1.86994937015564 |
| H  | 5.06736387093329  | 2.70182109148210 | 1.97091650053005 |
| H  | 3.63134086554170  | 3.34865452858214 | 2.77685808890083 |
| H  | 3.82850916609916  | 3.54004563418376 | 1.03168496871400 |
| H  | 0.93021261234354  | 2.12131727080379 | 0.54564936439242 |
| H  | 0.64890991654683  | 0.38196386045185 | 3.03318999574780 |
| Si | 3.09785586736600  | 1.23211612058144 | 1.59114784517668 |
| Si | -1.50901516489399 | 1.29384557561869 | 1.99372876756796 |
| H  | 3.64279022135227  | 0.58052903261791 | 0.37107770673947 |
| H  | 3.29514236230571  | 0.32089579863706 | 2.74674421364480 |
| H  | -1.73229486553562 | 2.14859042230030 | 0.80322121987269 |

|   |                   |                  |                  |
|---|-------------------|------------------|------------------|
| H | -2.23151410305135 | 0.00853770377234 | 1.82129735575811 |
| H | -2.06892708233079 | 1.96473639588567 | 3.19413839576480 |

**4<sup>Ge</sup>**  
E = -4271.294106789626 au  
ZPE = 0.10729533 au  
G<sub>corr</sub> = 0.07202566 au

|    |                   |                   |                  |
|----|-------------------|-------------------|------------------|
| C  | 0.31915208454999  | 0.86790642993448  | 1.88083341116253 |
| C  | 1.20042622980670  | 1.79009736389543  | 2.27078885368842 |
| C  | 4.10038169465719  | 2.68697293610638  | 1.15384404061804 |
| H  | 5.14870956518668  | 2.39515692641409  | 1.08854131335115 |
| H  | 4.04866458223081  | 3.70864566179322  | 1.53049850688800 |
| H  | 3.66504421754142  | 2.65912675773536  | 0.15520107969109 |
| H  | 0.84623498778609  | 2.78172940425606  | 2.54840434368907 |
| H  | 0.67466084054960  | -0.12293553769230 | 1.60449645376610 |
| Ge | 3.13142728267730  | 1.46680176825250  | 2.35241754949418 |
| Ge | -1.60218012096611 | 1.20273231967805  | 1.76337766065886 |
| H  | 3.35970478239136  | -0.00199272310658 | 1.93623508542775 |
| H  | 3.63518952276160  | 1.66385581486723  | 3.80016772265943 |
| H  | -1.85981504251633 | 2.66520247414970  | 2.17083278890377 |
| H  | -2.11187446621647 | 0.96754611840947  | 0.32664069629616 |
| H  | -2.38053783043984 | 0.26078198530686  | 2.70254115370539 |

**4<sup>Sn</sup>**  
E = -547.356101202813 au  
ZPE = 0.10057453 au  
G<sub>corr</sub> = 0.06308830 au

|    |                   |                   |                  |
|----|-------------------|-------------------|------------------|
| C  | 0.27592808432089  | 0.94381970379724  | 2.20160328988136 |
| C  | 1.16715510253251  | 1.45899134774956  | 1.35724558510086 |
| C  | 4.28054380689115  | 3.04785257712580  | 1.89364276626477 |
| H  | 5.35404051422376  | 2.89551018351404  | 1.99635937772993 |
| H  | 3.89441942215866  | 3.50822245884811  | 2.80195084546975 |
| H  | 4.09540097933747  | 3.71347328954789  | 1.05129858356324 |
| H  | 0.82749860813459  | 2.07307620864180  | 0.52494092048053 |
| H  | 0.61100658730175  | 0.32812698498744  | 3.03393611332278 |
| Sn | 3.28905721678846  | 1.15754676885361  | 1.55936082779572 |
| Sn | -1.84023264231170 | 1.26592107158240  | 2.01243926848965 |
| H  | 3.92103966014816  | 0.42663434544868  | 0.13771441730060 |
| H  | 3.51277972692326  | 0.10721059642684  | 2.89982215903405 |
| H  | -2.08554580303211 | 2.23921487743450  | 0.62404955891803 |
| H  | -2.67035100106681 | -0.22386526939976 | 1.83573575183439 |
| H  | -2.45794926235015 | 2.06478885544170  | 3.39864153481413 |

**4<sup>N</sup>**  
E = -228.213235750432 au  
ZPE = 0.11390264 au

$G_{\text{corr}} = 0.08427669 \text{ au}$

|   |                  |                   |                   |
|---|------------------|-------------------|-------------------|
| C | 2.31078976251540 | -1.59559349701486 | 0.04193904888572  |
| H | 2.78464893264410 | -2.53202935900723 | -0.25797054071923 |
| H | 2.51979412029585 | -0.84674486720931 | -0.73442298312859 |
| H | 1.23439428754896 | -1.76402114121743 | 0.08227502558178  |
| C | 4.16272899351716 | -1.11578408520438 | 1.54805361744974  |
| C | 4.79265391746986 | -0.23393585266222 | 2.32866823258575  |
| N | 2.79225655763282 | -1.21719789701331 | 1.36056551563291  |
| H | 2.27296648711682 | -0.45535352891043 | 1.77416871285136  |
| N | 6.20087768056122 | -0.34378088011040 | 2.55828119928288  |
| H | 6.66359320666076 | 0.55289535280162  | 2.46891147341736  |
| H | 6.40863494044991 | -0.69573059937958 | 3.48662255260786  |
| H | 4.74817281371845 | -1.87557033113075 | 1.03958825059461  |
| H | 4.22510154986862 | 0.55602208605829  | 2.82439064495782  |

**4<sup>P</sup>**  $E = -800.683010076002 \text{ au}$

$ZPE = 0.09710934 \text{ au}$

$G_{\text{corr}} = 0.06484006 \text{ au}$

|   |                  |                   |                   |
|---|------------------|-------------------|-------------------|
| C | 2.13614533678351 | -1.59695296651657 | -0.19210673348996 |
| H | 2.53380218104988 | -2.53715483460420 | -0.57679432718683 |
| H | 2.63248202005584 | -0.76776065254897 | -0.69471235598723 |
| H | 1.06873225272995 | -1.57175143610631 | -0.41564153355748 |
| C | 4.16586540674324 | -1.38677562218165 | 1.76508218099827  |
| C | 4.83720188201465 | -0.39605674676512 | 2.35540444236257  |
| P | 2.36087960113682 | -1.56458027884245 | 1.65182168238194  |
| H | 2.03360462606059 | -0.20344281090124 | 1.87919743821306  |
| P | 6.65849138162056 | -0.46376185591360 | 2.52162466253445  |
| H | 6.93055745627716 | 0.88954161117744  | 2.18177356140424  |
| H | 6.73547638564930 | -0.19014030217000 | 3.91510557411479  |
| H | 4.72550721950561 | -2.23887466639874 | 1.38113323041795  |
| H | 4.29786750037282 | 0.46088596177142  | 2.74918292779421  |

**4<sup>As</sup>**  $E = -4587.796260506876 \text{ au}$

$ZPE = 0.09270943 \text{ au}$

$G_{\text{corr}} = 0.05788424 \text{ au}$

|    |                  |                   |                   |
|----|------------------|-------------------|-------------------|
| C  | 2.05894478588731 | -2.08096879252475 | 0.07712020741705  |
| H  | 2.37225313527000 | -3.02005490072816 | 0.53094648282777  |
| H  | 2.68759965560308 | -1.86613880715934 | -0.78522516350725 |
| H  | 1.02120189100356 | -2.17141406176133 | -0.24209289044990 |
| C  | 4.13368635268772 | -0.42138247346344 | 1.38495271284779  |
| C  | 4.87571380467265 | -0.39553431114162 | 2.48560001558898  |
| As | 2.18437880546027 | -0.64753014886173 | 1.45291022057271  |
| H  | 1.89254674887159 | 0.48810556126930  | 0.46780894819443  |
| As | 6.82870117409959 | -0.19711310143978 | 2.39123977930654  |



|   |                  |                   |                  |
|---|------------------|-------------------|------------------|
| H | 6.91647130873706 | 0.86807477691748  | 3.48538718700317 |
| H | 7.13172634961496 | -1.30423053613600 | 3.40237595931661 |
| H | 4.59980222290724 | -0.33575778197869 | 0.40577632640344 |
| H | 4.41358701518481 | -0.48288002299190 | 3.46427096447862 |

**4<sup>Sb</sup>** E = -598.045430198830 au  
ZPE = 0.08781515 au  
G<sub>corr</sub> = 0.05096437 au

|    |                  |                   |                   |
|----|------------------|-------------------|-------------------|
| C  | 1.93726886984792 | -2.17963093420002 | -0.03223322842430 |
| H  | 2.25624803582710 | -3.13090420679963 | 0.39041647546591  |
| H  | 2.59633290954262 | -1.90264035106770 | -0.85265691137345 |
| H  | 0.91605414661372 | -2.27326006314184 | -0.39889231518930 |
| C  | 4.14711149400129 | -0.40006073467221 | 1.43556090606406  |
| C  | 4.91662817635715 | -0.37174502577064 | 2.51693594860222  |
| Sb | 2.00125493329062 | -0.66045636443921 | 1.53567147048447  |
| H  | 1.69114153042358 | 0.61985848025948  | 0.42640071606698  |
| Sb | 7.06532600307213 | -0.14685801087848 | 2.38590137966362  |
| H  | 7.13714114631037 | 1.03811659072107  | 3.62914244787069  |
| H  | 7.38357676260675 | -1.38808585833398 | 3.53210784611971  |
| H  | 4.58299097444034 | -0.31064647075589 | 0.44235043359674  |
| H  | 4.48553826766629 | -0.46051165092094 | 3.51036558105259  |

**4<sup>Bi</sup>** E = -546.751489822818 au  
ZPE = 0.08516710 au  
G<sub>corr</sub> = 0.04655348 au

|    |                  |                   |                   |
|----|------------------|-------------------|-------------------|
| C  | 1.90653384019282 | -2.24221605696907 | -0.07059112821691 |
| H  | 2.24339265330919 | -3.17888069392633 | 0.36903783596833  |
| H  | 2.58001345514009 | -1.93768976996445 | -0.86799561893083 |
| H  | 0.89551549775534 | -2.35500346191012 | -0.45752822030063 |
| C  | 4.14679058562603 | -0.34930807365456 | 1.45118995805369  |
| C  | 4.91745148808471 | -0.35175804513618 | 2.52671697242758  |
| Bi | 1.90243151501270 | -0.64716331154491 | 1.56483286701138  |
| H  | 1.58065516587664 | 0.66591018097425  | 0.36581831576433  |
| Bi | 7.16672499322953 | -0.10393062745208 | 2.37917136830280  |
| H  | 7.22291842854586 | 1.07756811502420  | 3.73986310402149  |
| H  | 7.48457351627952 | -1.44520573724056 | 3.54190992484053  |
| H  | 4.56068883497264 | -0.22712578125140 | 0.45253900372015  |
| H  | 4.50892327597485 | -0.47202133694876 | 3.52610636733806  |

**4<sup>O</sup>** E = -267.917368251515 au  
E = -267.450002026755 au [CASSCF(6,6)/MRACPF/def2-SVPD]  
ZPE = 0.08864020 au

$G_{\text{corr}} = 0.05934650$  au

|   |                  |                   |                   |
|---|------------------|-------------------|-------------------|
| C | 2.35140005987719 | -1.76062920617269 | 0.23069054619969  |
| H | 2.55938198986823 | -2.75310109902425 | 0.64434132329212  |
| H | 2.82233227511235 | -1.68048460948870 | -0.75577928292178 |
| H | 1.27627344189414 | -1.62739777815808 | 0.12682021745376  |
| C | 4.17191732092752 | -0.69632266983165 | 1.24166125782822  |
| C | 4.72606266981954 | -0.38814574841985 | 2.40789333418975  |
| H | 4.76809832953720 | -0.86012600047793 | 0.34719754589219  |
| H | 4.12202663673914 | -0.23185332941076 | 3.29521169542111  |
| O | 2.81170947372538 | -0.73685027345932 | 1.09936612822572  |
| O | 6.07956831674270 | -0.16367503057151 | 2.50823231252257  |
| H | 6.35858231575646 | -0.31600578498519 | 3.41599324189658  |

$4^{\text{S}}$   $E = -913.145660265064$  au

$ZPE = 0.08009133$  au

$G_{\text{corr}} = 0.04842645$  au

|   |                  |                   |                   |
|---|------------------|-------------------|-------------------|
| C | 2.16410545472186 | -1.93716849069759 | 0.05314492235661  |
| H | 2.44116067150247 | -2.88672870708199 | 0.50799134654264  |
| H | 2.74112825753484 | -1.77643204507909 | -0.85756559749720 |
| H | 1.10458958771117 | -1.95080769855183 | -0.19857000044857 |
| C | 4.15540755907250 | -0.56153437987582 | 1.33687858590857  |
| C | 4.79052706492119 | -0.27371404736891 | 2.47336971243059  |
| H | 4.70837350667137 | -0.72245913402316 | 0.41567291874584  |
| H | 4.24361222895747 | -0.13252526504799 | 3.39808625204221  |
| S | 2.40743578057336 | -0.55934893986161 | 1.21226055783953  |
| S | 6.52087790767496 | 0.06194122570304  | 2.50680475942824  |
| H | 6.77013481065858 | -0.47581404811499 | 3.71355486265147  |

$4^{\text{Se}}$   $E = -4917.917324727201$  au

$ZPE = 0.07718083$  au

$G_{\text{corr}} = 0.04286649$  au

|    |                  |                   |                   |
|----|------------------|-------------------|-------------------|
| C  | 2.09599739992741 | -2.00729254984971 | -0.00546310429631 |
| H  | 2.42715688139384 | -2.92039273869830 | 0.48184887449526  |
| H  | 2.67917359083298 | -1.81702006754546 | -0.90389299940780 |
| H  | 1.04231884509765 | -2.08435125792060 | -0.26547278095691 |
| C  | 4.16431364941413 | -0.48305789066980 | 1.35087944262015  |
| C  | 4.80191405766543 | -0.22650994500776 | 2.48712907002027  |
| H  | 4.69700050856483 | -0.63036529697409 | 0.41728314306174  |
| H  | 4.27745536777662 | -0.09678380309068 | 3.42534239234839  |
| Se | 2.26115893732439 | -0.48356661246740 | 1.22574826449844  |
| Se | 6.68954686599631 | 0.09941774202407  | 2.52568301625241  |
| H  | 6.91131672600633 | -0.56466910980024 | 3.82254300136434  |

**4<sup>Te</sup>** E = -652.555044644053 au  
 ZPE = 0.07447500 au  
 G<sub>corr</sub> = 0.03820696 au

|    |                  |                   |                   |
|----|------------------|-------------------|-------------------|
| C  | 2.00602903162979 | -2.10101716517926 | -0.10446189232992 |
| H  | 2.36984797664851 | -3.00182790006321 | 0.38065064886535  |
| H  | 2.61661460290794 | -1.85006921690832 | -0.96796223122777 |
| H  | 0.97064686751033 | -2.23123946776693 | -0.41191364162474 |
| C  | 4.16000436188578 | -0.39698108479092 | 1.41029273619685  |
| C  | 4.81558994044543 | -0.15266862358043 | 2.53721255005132  |
| H  | 4.67364838031092 | -0.51754504989464 | 0.46215060579874  |
| H  | 4.31349756657305 | -0.04609199923636 | 3.49108385676108  |
| Te | 2.05150675528212 | -0.45258947514146 | 1.29469835765472  |
| Te | 6.90072644916751 | 0.22925269751766  | 2.55460141480667  |
| H  | 7.16924089763843 | -0.69381424495608 | 3.91527591504763  |

**4<sup>Po</sup>** E = -591.980337213346 au  
 ZPE = 0.07296514 au  
 G<sub>corr</sub> = 0.03507742 au

|    |                  |                   |                   |
|----|------------------|-------------------|-------------------|
| C  | 1.97176672115646 | -2.17556445071810 | -0.11911409868914 |
| H  | 2.31904263540397 | -3.03141332766225 | 0.45025733212618  |
| H  | 2.61885391865160 | -1.97375313243795 | -0.96759808879129 |
| H  | 0.94726743494562 | -2.32366773079726 | -0.45248347636131 |
| C  | 4.18197870026109 | -0.30778225438555 | 1.38960652205004  |
| C  | 4.80341805802959 | -0.09620129203955 | 2.53593501919762  |
| H  | 4.70559214937934 | -0.41253581489592 | 0.44584933347676  |
| H  | 4.29256265497082 | -0.00684068270555 | 3.48635298216253  |
| Po | 1.96433663277785 | -0.35202009322044 | 1.22630845611133  |
| Po | 7.00113686371114 | 0.28207427717279  | 2.60959484614214  |
| H  | 7.24139706071245 | -0.81688702831022 | 3.95691949257512  |

**5<sup>N</sup>** E = -212.199697514936 au  
 ZPE = 0.12433933 au  
 G<sub>corr</sub> = 0.09490241 au

|   |                   |                  |                   |
|---|-------------------|------------------|-------------------|
| N | -1.15884857885029 | 2.93019820199749 | 1.18584834897513  |
| C | -0.10251503357953 | 3.38174346464580 | 1.70661948016245  |
| H | 0.29630249311063  | 4.36831983303560 | 1.41955104154059  |
| C | -1.83588921134814 | 3.73187468182767 | 0.18290357085261  |
| C | 0.67445649015156  | 2.62764454124056 | 2.73584423529282  |
| C | -1.90979312901684 | 2.98049773912819 | -1.14228311894933 |
| H | 1.70335519123754  | 2.47185281209126 | 2.39831639150085  |
| H | 0.20816584258406  | 1.66393635039750 | 2.93352152534934  |
| H | 0.73087642845492  | 3.20043343513417 | 3.66644365848609  |

|   |                   |                  |                   |
|---|-------------------|------------------|-------------------|
| H | -2.85047997656629 | 3.92347475349185 | 0.54508451520680  |
| H | -1.34570183939997 | 4.70746504950582 | 0.03991383127450  |
| H | -0.90919185588935 | 2.80492720430720 | -1.54222159426100 |
| H | -2.47795158943738 | 3.55330196417465 | -1.87789763265972 |
| H | -2.39357389145092 | 2.01258228902219 | -1.00478579277114 |

**5<sup>P</sup>** E = -498.426152591566 au  
 E = -498.007055049443au [CASSCF(8,6)/MRACPF/def2-SVPD]  
 ZPE = 0.11974061 au  
 G<sub>corr</sub> = 0.08888762 au

|   |                   |                  |                   |
|---|-------------------|------------------|-------------------|
| P | -1.40345739172913 | 2.48272498138103 | 1.36659296292381  |
| C | -0.00879639181369 | 3.24734290797214 | 1.86434231271781  |
| H | 0.26784946780256  | 4.21589082636411 | 1.45223207129699  |
| C | -2.10046949739683 | 3.65833492986998 | 0.09709983053380  |
| C | 0.93213444708293  | 2.68676684204942 | 2.88397239495865  |
| C | -1.98852330740698 | 3.10212499389400 | -1.32604319766477 |
| H | 1.93496762609263  | 2.56414410515564 | 2.46215259056479  |
| H | 0.59818457074532  | 1.71753172098474 | 3.25755283870269  |
| H | 1.03164613389313  | 3.36636730849608 | 3.73658104971521  |
| H | -3.15362233279314 | 3.81408227974375 | 0.34873790445870  |
| H | -1.60251555511708 | 4.62691033662949 | 0.17616723234592  |
| H | -0.94344288909068 | 2.99633117536817 | -1.62258544687804 |
| H | -2.47991692307165 | 3.76227227005076 | -2.04445909351332 |
| H | -2.45482661719736 | 2.11742764204063 | -1.40548499016228 |

**5<sup>As</sup>** E = -2391.981967604694 au  
 E = -2391.39870522949au [CASSCF(8,6)/MRACPF/def2-SVPD]  
 ZPE = 0.11844104 au  
 G<sub>corr</sub> = 0.08633039 au

|    |                   |                  |                   |
|----|-------------------|------------------|-------------------|
| As | -1.53414710571457 | 2.39661997631926 | 1.47138332774651  |
| C  | 0.00269955287221  | 3.20820096454497 | 1.89750937709431  |
| H  | 0.26765190816094  | 4.14423625586866 | 1.41145483117570  |
| C  | -2.20699076633540 | 3.65660430866259 | 0.07235852183160  |
| C  | 0.98195668737550  | 2.69300861344916 | 2.89934930237042  |
| C  | -1.95571069797605 | 3.13891402721391 | -1.34318626851277 |
| H  | 1.96132089896435  | 2.52617676587627 | 2.43710068595306  |
| H  | 0.65607331041300  | 1.75396432024470 | 3.34988407968163  |
| H  | 1.13936863308572  | 3.42027321993051 | 3.70349341396558  |
| H  | -3.27768271026608 | 3.77876723145824 | 0.24896964854400  |
| H  | -1.73382408666280 | 4.62698410586363 | 0.22834292009336  |
| H  | -0.88642202776641 | 3.06028596316494 | -1.54868631438925 |
| H  | -2.39361703373137 | 3.80640229543795 | -2.09045321125592 |
| H  | -2.39146522241900 | 2.14781427196506 | -1.49066185429828 |

**5<sup>Sb</sup>**  
 E = -397.103853464947 au  
 E = -396.61232005295 au [CASSCF(8,6)/MRACPF/def2-SVPD]  
 ZPE = 0.11708901 au  
 G<sub>corr</sub> = 0.08383649 au

|    |                   |                  |                   |
|----|-------------------|------------------|-------------------|
| Sb | -1.63031569225944 | 2.30841042493718 | 1.51558043838008  |
| C  | 0.10171285247223  | 3.15644819236852 | 2.01161943053427  |
| H  | 0.40231169101298  | 4.05712884755740 | 1.48099752686797  |
| C  | -2.16336896534893 | 3.73634523483737 | -0.06797329461860 |
| C  | 1.04900310167237  | 2.68495461050153 | 3.06231701956495  |
| C  | -2.11737831311683 | 3.12409388636181 | -1.46609153750649 |
| H  | 2.03451448026085  | 2.46838411183705 | 2.63297777246431  |
| H  | 0.69965992654906  | 1.78476970153866 | 3.57121731279385  |
| H  | 1.21015752790573  | 3.45990194231134 | 3.82124111856517  |
| H  | -3.16518631016845 | 4.10505260028158 | 0.16061588120926  |
| H  | -1.47405960117384 | 4.57695554098839 | 0.02239684977265  |
| H  | -1.11181778262061 | 2.78049002629041 | -1.71757279195098 |
| H  | -2.41864512307852 | 3.85022602830748 | -2.22730326746912 |
| H  | -2.78737645210659 | 2.26509117188116 | -1.55316399860733 |

**5<sup>Bi</sup>**  
 E = -371.458104024735 au  
 E = -370.900557299804 au [CASSCF(8,6)/MRACPF/def2-SVPD]  
 ZPE = 0.11621401 au  
 G<sub>corr</sub> = 0.08325827 au

|    |                   |                  |                   |
|----|-------------------|------------------|-------------------|
| Bi | -0.65910442145706 | 1.94202547837346 | 0.73225083840425  |
| C  | 0.17062314380460  | 3.17170407882220 | 2.19411507435826  |
| H  | -0.06402296438366 | 4.23318763153975 | 2.15797144365861  |
| C  | -1.78675833811624 | 3.63664463131527 | -0.34738651325541 |
| C  | 1.07331684369755  | 2.75047987945073 | 3.30274632094188  |
| C  | -2.49137482873439 | 3.14938845705299 | -1.60635214020241 |
| H  | 2.03246031780301  | 3.28093949729139 | 3.25185300331282  |
| H  | 1.28308951112930  | 1.67917014842401 | 3.29493713609141  |
| H  | 0.64085681740886  | 3.00077307409702 | 4.27957986876955  |
| H  | -2.49103007926583 | 4.04572284303231 | 0.37684113290116  |
| H  | -1.04326915589885 | 4.40174213896663 | -0.57030278002021 |
| H  | -1.78476539855540 | 2.73320219946279 | -2.32882803200335 |
| H  | -3.02586399992664 | 3.96272811181770 | -2.10748349801476 |
| H  | -3.22494610750522 | 2.37054415035372 | -1.38308339494181 |

**6<sup>N</sup>**  
 E = -226.997002798904 au  
 ZPE = 0.09031936 au  
 G<sub>corr</sub> = 0.06167945 au

|   |                   |                  |                  |
|---|-------------------|------------------|------------------|
| C | -0.09034993736075 | 3.04254177503205 | 0.84154232805479 |
|---|-------------------|------------------|------------------|

|   |                   |                  |                  |
|---|-------------------|------------------|------------------|
| H | 0.64305819635239  | 3.09436828120705 | 0.02689524637467 |
| H | -0.88973790519569 | 2.31000734968770 | 0.74681254433739 |
| N | -0.04839931477882 | 3.78043753998185 | 1.86181011332664 |
| C | 1.02895289705884  | 4.75017085673558 | 1.95819853552300 |
| H | 1.63537773148274  | 4.47562396908427 | 2.83071722239934 |
| C | 0.46741792709525  | 6.12286229473816 | 2.20891875537292 |
| H | 1.68223640438844  | 4.77933786802135 | 1.07765456284693 |
| H | -0.32222425532412 | 6.16486564182872 | 2.96747855032022 |
| N | 0.89922402285686  | 7.12915148798636 | 1.57694763689230 |
| H | 0.42987074342484  | 7.98393706569675 | 1.87715713455174 |

**6<sup>P</sup>** E = -799.451971356681 au  
E = -798.965750423657 au [CASSCF(8,6)/MRACPF/def2-SVPD]  
ZPE = 0.07928486 au  
G<sub>corr</sub> = 0.04838771 au

|   |                   |                  |                   |
|---|-------------------|------------------|-------------------|
| C | 0.21512534877962  | 2.93182463816145 | 1.91296727745126  |
| H | 0.73064021579072  | 3.47590972272179 | 2.69597066519163  |
| H | -0.01114638869869 | 1.89190634874098 | 2.11977203242015  |
| P | -0.23876517897360 | 3.55580427776955 | 0.44909172943533  |
| C | 0.37795967410288  | 5.35013558445312 | 0.47792495247514  |
| H | 1.33622146950601  | 5.34723304384804 | -0.05031872852581 |
| C | 0.48370397865449  | 5.96431423230516 | 1.81979833793339  |
| H | -0.33448161271440 | 5.89365052663449 | -0.14953685944545 |
| H | -0.46265478852143 | 6.17136332326391 | 2.30937149784408  |
| P | 1.94174415291011  | 6.26975590177931 | 2.58780990528749  |
| H | 1.39707963916425  | 6.78140653032202 | 3.80128181993273  |

**6<sup>As</sup>** E = -4586.565241155862 au  
E = -4585.74910062949 au [CASSCF(8,6)/MRACPF/def2-SVPD]  
ZPE = 0.07656394 au  
G<sub>corr</sub> = 0.04356311 au

|    |                   |                  |                  |
|----|-------------------|------------------|------------------|
| C  | -0.48977587096790 | 3.40963635592888 | 0.60215701191260 |
| H  | -0.50832117048470 | 4.42670544382868 | 0.22716781002122 |
| H  | -1.09743504108086 | 2.68314034574141 | 0.07630470116870 |
| As | 0.45746972699739  | 2.87565826169553 | 2.00441673442861 |
| C  | 1.42355237727087  | 4.59730401599975 | 2.55038258458709 |
| H  | 1.53554520830913  | 4.48215420581344 | 3.63049326635968 |
| C  | 0.70775378632684  | 5.82286463829334 | 2.19143733944689 |
| H  | 2.41033850755080  | 4.52247279018235 | 2.08928059701558 |
| H  | -0.17352788230204 | 6.04840686900595 | 2.78205197510512 |
| As | 1.16929523619491  | 6.89571868332941 | 0.81795689615977 |
| H  | 0.00053163218554  | 7.86924252018105 | 1.00248371379471 |

**6<sup>Sb</sup>** E = -596.812096227292 au  
 E = -596.177937594001 au [CASSCF(8,6)/MRACPF/def2-SVPD]  
 ZPE = 0.07323969 au  
 G<sub>corr</sub> = 0.03818450 au

|    |                   |                  |                   |
|----|-------------------|------------------|-------------------|
| C  | -0.10864325128923 | 2.74418128949312 | 0.33199075402562  |
| H  | 0.93986159236611  | 2.83071895684628 | 0.07138719365916  |
| H  | -0.70790513543284 | 2.13068531613853 | -0.33059993108947 |
| Sb | -0.93455079128428 | 3.65998399645862 | 1.87457975568322  |
| C  | 0.93130746762108  | 4.72363469796342 | 2.54357769252646  |
| H  | 1.09260282136926  | 4.40816169793647 | 3.57512655920090  |
| C  | 0.68315985675020  | 6.15305489810935 | 2.40054434738884  |
| H  | 1.71092313922197  | 4.32370481962286 | 1.89738889035716  |
| H  | 0.10318183697768  | 6.61049083016398 | 3.19678765583802  |
| Sb | 1.24495512052909  | 7.33202162835846 | 0.86793580088605  |
| H  | 0.48053385317092  | 8.71666599890875 | 1.54541391152397  |

**6<sup>Bi</sup>** E = -545.526259214943 au  
 E = -544.760601011592 au [CASSCF(8,6)/MRACPF/def2-SVPD]  
 ZPE = 0.07167427 au  
 G<sub>corr</sub> = 0.03521477 au

|    |                   |                  |                   |
|----|-------------------|------------------|-------------------|
| C  | -0.62349696493552 | 2.67794386906156 | 1.02324918915277  |
| H  | -0.36888464959439 | 2.45987264499992 | 2.05398129747004  |
| H  | -1.47153315799460 | 2.13549675636651 | 0.62122296633924  |
| Bi | 0.32975178570773  | 4.13933773063050 | -0.08709568563103 |
| C  | 1.73783700334911  | 4.93482169611554 | 1.65181977962114  |
| H  | 1.89828436365118  | 4.06653853294078 | 2.28811751087167  |
| C  | 0.88784166103138  | 5.97063787444262 | 2.16603887947850  |
| H  | 2.64650649480649  | 5.24730751720609 | 1.14281723344812  |
| H  | 0.13088186716576  | 5.65008658656776 | 2.87514090835205  |
| Bi | 0.84696656582975  | 8.02038631139958 | 1.59125781815739  |
| H  | -0.57872845901690 | 8.33087461026886 | 2.64758273274004  |

**7<sup>N</sup>** E = -228.222714374713 au  
 ZPE = 0.11384147 au  
 G<sub>corr</sub> = 0.08453989 au

|   |                   |                  |                   |
|---|-------------------|------------------|-------------------|
| N | 0.85995205927219  | 4.89088492365496 | 1.60520022696568  |
| C | 0.02103354224224  | 4.81463031932821 | 0.42715677941498  |
| C | 1.08109207104023  | 3.83289536836141 | 2.25496973731016  |
| H | 0.67858995408364  | 2.85627526483824 | 1.94665851600420  |
| H | 0.58198979054593  | 5.18262617215827 | -0.43510952340185 |
| H | -0.34318737507007 | 3.80066676312869 | 0.21086046175581  |
| H | -0.83611170427496 | 5.47994225017194 | 0.55544868168576  |
| C | 1.93585586812388  | 3.81664568282726 | 3.48800665801103  |
| H | 1.30968804084336  | 3.51458939515657 | 4.33451737787424  |

|   |                  |                  |                  |
|---|------------------|------------------|------------------|
| H | 2.28830072867684 | 4.83624769128814 | 3.68086481083038 |
| N | 2.99077343450105 | 2.81041987898270 | 3.33928907437083 |
| H | 3.68617392671568 | 3.12395571256200 | 2.67196463446389 |
| H | 3.46538120329998 | 2.65041329754157 | 4.21903588471488 |

7<sup>P</sup> E = -800.684668537831 au  
E = -800.188504507727 au [CASSCF(8,6)/MRACPF/def2-SVPD]  
ZPE = 0.09940537 au  
G<sub>corr</sub> = 0.06728726 au

|   |                   |                  |                   |
|---|-------------------|------------------|-------------------|
| P | 1.00886086080009  | 5.30004505924936 | 1.51453149738778  |
| C | -0.16001166432067 | 4.88590341663796 | 0.13387186801948  |
| C | 1.02918959918707  | 3.90407956625795 | 2.42582520545738  |
| H | 0.44074602073614  | 3.03532147621727 | 2.13833477528490  |
| H | 0.36616720000283  | 4.96182188495305 | -0.82033116467408 |
| H | -0.58162241126290 | 3.88528110752482 | 0.22946065821937  |
| H | -0.97186951194534 | 5.61612538051150 | 0.11465499572482  |
| C | 1.86999555321815  | 3.73727276113747 | 3.64680777315235  |
| H | 1.26066242042664  | 3.37663535088584 | 4.48181139013442  |
| H | 2.33376883283734  | 4.67686534079828 | 3.94619498593042  |
| P | 3.17293404358438  | 2.40923875561113 | 3.35344233286575  |
| H | 4.04975398225038  | 3.20933147642396 | 2.57731846608639  |
| H | 3.90095661448586  | 2.61227114379134 | 4.55694053641096  |

7<sup>As</sup> E = -4587.798791597225 au  
E = -4586.97137920671 au [CASSCF(8,6)/MRACPF/def2-SVPD]  
ZPE = 0.09593211 au  
G<sub>corr</sub> = 0.06157050 au

|    |                   |                  |                   |
|----|-------------------|------------------|-------------------|
| As | 1.08652691632348  | 5.41208867389936 | 1.46106442430467  |
| C  | -0.22451966665680 | 4.90400125868084 | 0.05495686863994  |
| C  | 1.02223553139698  | 3.94298427368471 | 2.48726333816213  |
| H  | 0.36525985235477  | 3.12123011571482 | 2.21324352085526  |
| H  | 0.27526591359549  | 4.89464362980316 | -0.91420278799228 |
| H  | -0.64985100448779 | 3.92157369194491 | 0.25408301973445  |
| H  | -1.02182570975897 | 5.64682747398127 | 0.02047890058165  |
| C  | 1.85245513872776  | 3.73727823723534 | 3.69228173385258  |
| H  | 1.26289380320376  | 3.35164324905747 | 4.52789776118774  |
| H  | 2.36881133235086  | 4.64090353487430 | 4.00994110950018  |
| As | 3.22764105921533  | 2.29541670570305 | 3.32553777175192  |
| H  | 4.15056793210374  | 3.22284320656907 | 2.54082752029000  |
| H  | 4.00407044163131  | 2.51875866885156 | 4.62549013913170  |

7<sup>Sb</sup> E = -598.047877661166 au  
E = -597.404616975115 au [CASSCF(8,6)/MRACPF/def2-SVPD]



ZPE = 0.09196320 au

G<sub>corr</sub> = 0.05583068 au

|    |                   |                  |                   |
|----|-------------------|------------------|-------------------|
| Sb | 1.20455593622729  | 5.56827168347039 | 1.34161348907941  |
| C  | -0.32870192116347 | 4.93285109617805 | -0.08220968952151 |
| C  | 1.02048768059874  | 3.99601975123893 | 2.56971499713445  |
| H  | 0.28206682547429  | 3.23989942104820 | 2.31229629360913  |
| H  | 0.12350962341873  | 4.77057236300677 | -1.05996413626270 |
| H  | -0.78793016627934 | 4.00887824504468 | 0.26618113996599  |
| H  | -1.08957006398336 | 5.70762821179974 | -0.17030371593602 |
| C  | 1.81356688339252  | 3.72413032661967 | 3.76932506903393  |
| H  | 1.23472241358410  | 3.27750100176661 | 4.58001183525603  |
| H  | 2.37401547839421  | 4.57761870149649 | 4.14393940493740  |
| Sb | 3.34439467384738  | 2.16698749385451 | 3.26952975143265  |
| H  | 4.37784200118534  | 3.34295150098762 | 2.57166615279497  |
| H  | 4.15057217530353  | 2.29688292348820 | 4.78706272847618  |

**7<sup>Bi</sup>** E = -546.758851555229 au

E = -545.98255256769 au [CASSCF(8,6)/MRACPF/def2-SVPD]

ZPE = 0.08988058 au

G<sub>corr</sub> = 0.05207435 au

|    |                   |                  |                   |
|----|-------------------|------------------|-------------------|
| Bi | 1.27353687040082  | 5.62985378264339 | 1.25923459355753  |
| C  | -0.37347068728144 | 4.90725792796469 | -0.15425669368269 |
| C  | 1.01514777813322  | 4.03226053648570 | 2.60728350501908  |
| H  | 0.24021297219940  | 3.31020938857948 | 2.35916069875965  |
| H  | 0.06802482153823  | 4.61288907646826 | -1.10476044685755 |
| H  | -0.87467007439735 | 4.05664194414595 | 0.30402365874616  |
| H  | -1.08637892354843 | 5.71384485449079 | -0.31717173229725 |
| C  | 1.77644070285595  | 3.75700665409454 | 3.80604979957603  |
| H  | 1.22124590748458  | 3.26449313781356 | 4.60476417761432  |
| H  | 2.36950180187633  | 4.57960554713385 | 4.19562317631260  |
| Bi | 3.40228291928919  | 2.14210386612842 | 3.22037685551611  |
| H  | 4.49428191015795  | 3.45858672987672 | 2.66836051509286  |
| H  | 4.19337554129154  | 2.14543927417455 | 4.85017521264309  |

**CH<sub>2</sub>=CH<sub>2</sub>** E = -78.439536875881 au

E = -78.305274101452 au [CASSCF(6,6)/MRACPF/def2-SVPD]

ZPE = 0.05091817 au

G<sub>corr</sub> = 0.02939867 au

|   |                   |                   |                  |
|---|-------------------|-------------------|------------------|
| C | 0.38523242958429  | 0.94509694078870  | 0.38675586386309 |
| H | 0.89860409377577  | -0.00915281091743 | 0.38675592468037 |
| H | -0.69782480959164 | 0.91192685604553  | 0.38675586734631 |
| C | 1.04758128189125  | 2.09262210823183  | 0.38675592535617 |
| H | 0.53420954339267  | 3.04687176115926  | 0.38675590804281 |
| H | 2.13063844094765  | 2.12579220469212  | 0.38675585071126 |

**CH<sub>3</sub>-BH<sub>2</sub>** E = -65.797576779684 au

ZPE = 0.05549932 au

G<sub>corr</sub> = 0.03220895 au

|   |                   |                  |                   |
|---|-------------------|------------------|-------------------|
| B | 0.24772150350817  | 3.73079688623850 | 0.09956930597696  |
| H | 0.85840750406510  | 4.64805432609368 | 0.56139037247035  |
| C | -1.30314861682466 | 3.74850246861919 | 0.05074439272838  |
| H | -1.74752623308435 | 3.10904320550302 | -0.71393647300000 |
| H | -1.75300272124268 | 4.74225964203922 | 0.01817247625425  |
| H | -1.60735957106632 | 3.31298571338038 | 1.01905224358734  |
| H | 0.86223000464473  | 2.77401925812600 | -0.26727144801728 |

**CH<sub>3</sub>-AlH<sub>2</sub>** E = -283.017000756422 au

ZPE = 0.04766598 au

G<sub>corr</sub> = 0.02328039 au

|    |                   |                  |                   |
|----|-------------------|------------------|-------------------|
| Al | 0.42447906641152  | 3.73395316189061 | 0.10775017006585  |
| H  | 1.23998766042757  | 5.01174988719238 | 0.57078942885238  |
| C  | -1.53092920531067 | 3.73458290976206 | 0.09451138395267  |
| H  | -1.93277631409244 | 3.20011443559870 | -0.77067573824959 |
| H  | -1.95841048386485 | 4.73935104124636 | 0.10855335253554  |
| H  | -1.90738398513882 | 3.21142992195111 | 0.98170477979968  |
| H  | 1.22235513156769  | 2.43448014235874 | -0.32491250695652 |

**CH<sub>3</sub>-GaH<sub>2</sub>** E = -1964.481098256562 au

ZPE = 0.04782524 au

G<sub>corr</sub> = 0.02229129 au

|    |                   |                  |                   |
|----|-------------------|------------------|-------------------|
| Ga | 0.43327100286045  | 3.73367458497086 | 0.10820756389474  |
| H  | 1.24282582998805  | 4.99906962776074 | 0.58460658682466  |
| C  | -1.54644377943444 | 3.73450350438509 | 0.09262734138726  |
| H  | -1.93462592738066 | 3.18470591550224 | -0.76615573315064 |
| H  | -1.95878702690968 | 4.74328967951854 | 0.09256107897412  |
| H  | -1.90542523154712 | 3.22445009794748 | 0.99208654496396  |
| H  | 1.22650700242341  | 2.44596808991501 | -0.33621251289410 |

**CH<sub>3</sub>-InH<sub>2</sub>** E = -230.487592778386 au

E = -230.221280945481 au [CASSCF(6,6)/MRACPF/def2-SVPD]

ZPE = 0.04605745 au

G<sub>corr</sub> = 0.01948236 au

|    |                  |                  |                  |
|----|------------------|------------------|------------------|
| In | 0.51816779638548 | 3.73249479188988 | 0.11085648460679 |
| H  | 1.40420011377253 | 5.13541621545338 | 0.62646921647012 |

|   |                   |                  |                   |
|---|-------------------|------------------|-------------------|
| C | -1.65630281600566 | 3.73100452561218 | 0.09671903511642  |
| H | -2.03113313314471 | 3.18983552270962 | -0.77192451319800 |
| H | -2.05292447575194 | 4.74512926368479 | 0.09490941529426  |
| H | -2.01511660836465 | 3.21972341314465 | 0.99273807421109  |
| H | 1.39043099310896  | 2.31205776750544 | -0.38204684250068 |

**CH<sub>3</sub>-CH<sub>3</sub>** E = -79.675371884486 au  
E = -79.536219431848 au [CASSCF(8,6)/MRACPF/def2-SVPD]  
ZPE = 0.07437551 au  
G<sub>corr</sub> = 0.05125541 au

|   |                   |                   |                   |
|---|-------------------|-------------------|-------------------|
| C | -0.66800282983779 | 0.65385739818262  | -1.31293515142985 |
| H | -0.12282684166028 | -0.27678413351344 | -1.14173215316382 |
| H | -0.55067627154633 | 1.27347336364917  | -0.42128124917978 |
| H | -1.72718307275635 | 0.40379060809260  | -1.40360307458524 |
| C | -0.15898983752621 | 1.37350198380431  | -2.55933104498186 |
| H | 0.90019065330116  | 1.62356770884469  | -2.46866302366946 |
| H | -0.70416497533903 | 2.30414428459042  | -2.73053304115872 |
| H | -0.27631710463517 | 0.75388669634962  | -3.45098530183126 |

**CH<sub>3</sub>-SiH<sub>3</sub>** E = -330.690172279490 au  
ZPE = 0.06081520 au  
G<sub>corr</sub> = 0.03593388 au

|    |                  |                  |                  |
|----|------------------|------------------|------------------|
| C  | 3.77114207905829 | 2.62708220314037 | 1.50494688491184 |
| H  | 4.83403184334689 | 2.37803537210273 | 1.50514620049210 |
| H  | 3.62408147608335 | 3.48082674978087 | 2.16926743051235 |
| H  | 3.49599830687446 | 2.93401125509424 | 0.49397081271463 |
| Si | 2.73958600407415 | 1.16131301568059 | 2.06190521339391 |
| H  | 3.11449364507584 | 0.75101257515020 | 3.43794260728857 |
| H  | 1.29607587554873 | 1.50589729864500 | 2.05555051781140 |
| H  | 2.94610940993830 | 0.00312286040601 | 1.15736066287519 |

**CH<sub>3</sub>-GeH<sub>3</sub>** E = -2117.237360801692 au  
ZPE = 0.05913599 au  
G<sub>corr</sub> = 0.03286617 au

|    |                  |                   |                  |
|----|------------------|-------------------|------------------|
| C  | 3.80105161999802 | 2.66971003883639  | 1.48883315298583 |
| H  | 4.85874102294007 | 2.40736143216998  | 1.48883052521510 |
| H  | 3.64981918141237 | 3.51387367521740  | 2.16121172373087 |
| H  | 3.51446291471109 | 2.96903969465583  | 0.48083037585986 |
| Ge | 2.72034124873572 | 1.13420025202827  | 2.07255252588273 |
| H  | 3.11632465781405 | 0.71136660207008  | 3.50050855741028 |
| H  | 1.22299072534090 | 1.49883429647955  | 2.06637033662969 |
| H  | 2.93778726904777 | -0.06308466145751 | 1.12695313228564 |

**CH<sub>3</sub>-SnH<sub>3</sub>** E = -255.269760743869 au

ZPE = 0.05556147 au

G<sub>corr</sub> = 0.02805300 au

|    |                  |                   |                  |
|----|------------------|-------------------|------------------|
| C  | 3.86647299779083 | 2.76251644347787  | 1.45351387131845 |
| H  | 4.92082489868521 | 2.49061971549908  | 1.44434648878016 |
| H  | 3.71944499510148 | 3.59792203779644  | 2.13634459548760 |
| H  | 3.56680634338509 | 3.06406026136731  | 0.45090649947832 |
| Sn | 2.68017083402188 | 1.07648269962670  | 2.09427928144369 |
| H  | 3.13453155151171 | 0.60366630235454  | 3.67837502965858 |
| H  | 1.01706380997119 | 1.49381043190689  | 2.09715865979536 |
| H  | 2.91620320953260 | -0.24777656202884 | 1.03116590403782 |

**CH<sub>3</sub>-NH<sub>2</sub>** E = -95.699472477154 au

ZPE = 0.06370738 au

G<sub>corr</sub> = 0.04076742 au

|   |                  |                   |                   |
|---|------------------|-------------------|-------------------|
| C | 2.43379750094523 | 0.64409609268184  | 0.23803396473924  |
| H | 2.80533188950474 | -0.38198336451734 | 0.25997331128764  |
| H | 2.80421078843273 | 1.14073718852884  | 1.13653866510437  |
| H | 2.87920077348072 | 1.14547010801241  | -0.63268878821707 |
| N | 0.97118869323675 | 0.62787243222819  | 0.26548882941925  |
| H | 0.60185930768921 | 1.57117289612663  | 0.26328404965758  |
| H | 0.60209040671062 | 0.16545028693943  | -0.55688238199102 |

**CH<sub>3</sub>-PH<sub>2</sub>** E = -381.932156838862 au

E = -381.714227983371 au [CASSCF(8,6)/MRACPF/def2-SVPD]

ZPE = 0.05420142 au

G<sub>corr</sub> = 0.02965884 au

|   |                  |                   |                   |
|---|------------------|-------------------|-------------------|
| C | 2.58881259145355 | 0.61519785672567  | 0.28867448859830  |
| H | 3.00342690370111 | -0.39355173486672 | 0.27274807132142  |
| H | 3.00370562821839 | 1.12966682566147  | 1.15633371496337  |
| H | 2.89520227749822 | 1.13927441408462  | -0.61490490073638 |
| P | 0.74135300025047 | 0.49899434849039  | 0.49167130793615  |
| H | 0.43273605980151 | 1.85486942753282  | 0.20484755525085  |
| H | 0.43244289907675 | 0.06836450237175  | -0.82562258733371 |

**CH<sub>3</sub>-AsH<sub>2</sub>** E = -2275.489147056667 au

E = -2275.06458586079 au [CASSCF(8,6)/MRACPF/def2-SVPD]

ZPE = 0.05202927 au

G<sub>corr</sub> = 0.02608054 au

|    |                  |                   |                   |
|----|------------------|-------------------|-------------------|
| C  | 2.64391941817136 | 0.60773106083848  | 0.30066629573056  |
| H  | 3.05794554111136 | -0.39938455842924 | 0.27656169535500  |
| H  | 3.05619817613806 | 1.13281922241490  | 1.16124965327053  |
| H  | 2.91135114839662 | 1.13488622070857  | -0.61138144202228 |
| As | 0.67111136516075 | 0.47048751647441  | 0.53821854804925  |
| H  | 0.37896723915618 | 1.93281938006909  | 0.20483932947979  |
| H  | 0.37818647186567 | 0.03345679792378  | -0.89640642986285 |

**CH<sub>3</sub>-SbH<sub>2</sub>** E = -280.613984311756 au  
E = -280.321286856143 au [CASSCF(8,6)/MRACPF/def2-SVPD]  
ZPE = 0.04930404 au  
G<sub>corr</sub> = 0.02224246 au

|    |                  |                   |                   |
|----|------------------|-------------------|-------------------|
| C  | 2.72807438192823 | 0.59618392504005  | 0.32009134624176  |
| H  | 3.15254578929629 | -0.40580021833114 | 0.28473612718519  |
| H  | 3.14958373696100 | 1.13163483938593  | 1.16931729585179  |
| H  | 2.95598110849643 | 1.12677118476467  | -0.60045955152494 |
| Sb | 0.56860216281261 | 0.43108240685660  | 0.60438244886358  |
| H  | 0.27195335394704 | 2.07735567587287  | 0.21464752122275  |
| H  | 0.27093882655839 | -0.04441217358899 | -1.01896753784013 |

**CH<sub>3</sub>-BiH<sub>2</sub>** E = -254.967299524267 au  
E = -254.60740753351 au [CASSCF(8,6)/MRACPF/def2-SVPD]  
ZPE = 0.04792955 au  
G<sub>corr</sub> = 0.01988696 au

|    |                  |                   |                   |
|----|------------------|-------------------|-------------------|
| C  | 2.77040880366939 | 0.59133511859799  | 0.32808400798678  |
| H  | 3.19114064994861 | -0.41135343828635 | 0.28860332523156  |
| H  | 3.18725926857842 | 1.13370298934074  | 1.17437306836361  |
| H  | 2.97251894650703 | 1.12276697725488  | -0.59705213391158 |
| Bi | 0.51480163321680 | 0.41034195198583  | 0.63871768541053  |
| H  | 0.23110639329805 | 2.13783327223713  | 0.21438122473705  |
| H  | 0.23044366478170 | -0.07181123113023 | -1.07335952781795 |

**CH<sub>3</sub>-OH** E = -115.555028214015 au  
E = -115.351595143124 au [CASSCF(6,6)/MRACPF/def2-SVPD]  
ZPE = 0.05097328 au  
G<sub>corr</sub> = 0.02818610 au

|   |                  |                   |                   |
|---|------------------|-------------------|-------------------|
| C | 2.42968742338976 | 0.65297044185859  | 0.25571722243951  |
| H | 2.76917689352244 | -0.38209496937041 | 0.25548404582483  |
| H | 2.83206547117104 | 1.14770045724797  | 1.14705878485951  |
| H | 2.83163706400850 | 1.14797540698902  | -0.63566921401902 |
| O | 1.00881707570995 | 0.61996891789204  | 0.25604185950158  |
| H | 0.67902402219830 | 1.52396111538279  | 0.25683218139360  |

**CH<sub>3</sub>-SH** E = -438.164950352546 au  
 ZPE = 0.04581850 au  
 G<sub>corr</sub> = 0.02157168 au

|   |                  |                   |                   |
|---|------------------|-------------------|-------------------|
| C | 2.55992818472709 | 0.61390850242356  | 0.25565603106621  |
| H | 2.94514026061403 | -0.40461950650791 | 0.25524803111189  |
| H | 2.91605166371816 | 1.12305714514653  | 1.14898743560980  |
| H | 2.91565552802799 | 1.12364281494138  | -0.63750090736517 |
| S | 0.74187748959690 | 0.46948758080854  | 0.25603011358332  |
| H | 0.47175482331583 | 1.78500483318791  | 0.25704417599395  |

**CH<sub>3</sub>-SeH** E = -2440.551335825452 au  
 ZPE = 0.04430450 au  
 G<sub>corr</sub> = 0.01860218 au

|    |                  |                   |                   |
|----|------------------|-------------------|-------------------|
| C  | 2.61449750710168 | 0.59895130964493  | 0.25561789612065  |
| H  | 3.00475511799872 | -0.41638122892192 | 0.25520437728585  |
| H  | 2.94649215398754 | 1.11650108967612  | 1.15101490103680  |
| H  | 2.94617695726819 | 1.11713398695346  | -0.63953071227265 |
| Se | 0.65122137037194 | 0.42294898424360  | 0.25592518349317  |
| H  | 0.38726484327192 | 1.87132722840380  | 0.25723323433617  |

**CH<sub>3</sub>-TeH** E = -307.870051773440 au  
 ZPE = 0.04267259 au  
 G<sub>corr</sub> = 0.01591950 au

|    |                  |                   |                   |
|----|------------------|-------------------|-------------------|
| C  | 2.68301323919731 | 0.57760596305847  | 0.25557023311709  |
| H  | 3.09103056257911 | -0.43063143445106 | 0.25512858161159  |
| H  | 2.99608540688926 | 1.10364671030088  | 1.15187931085959  |
| H  | 2.99585659250005 | 1.10436842246619  | -0.64039474340664 |
| Te | 0.52747470892939 | 0.35694268156136  | 0.25580840117784  |
| H  | 0.25694743990486 | 1.99854902706416  | 0.25747309664052  |

**CH<sub>3</sub>-PoH** E = -277.582800109094 au  
 ZPE = 0.04182257 au  
 G<sub>corr</sub> = 0.01417807 au

|    |                  |                   |                   |
|----|------------------|-------------------|-------------------|
| C  | 2.72138210279590 | 0.56851513152929  | 0.25554530737542  |
| H  | 3.12841540371144 | -0.43968233102658 | 0.25511082309875  |
| H  | 3.01836536909772 | 1.09911004080916  | 1.15365980077730  |
| H  | 3.01819286461821 | 1.09984798653863  | -0.64218927653566 |
| Po | 0.46523062032671 | 0.32514137013763  | 0.25572758608125  |
| H  | 0.19882158945001 | 2.05754917201187  | 0.25761063920293  |

**CH<sub>2</sub>=NH** E = -94.474595711883 au

ZPE = 0.03975471 au

G<sub>corr</sub> = 0.01784885 au

|   |                   |                   |                   |
|---|-------------------|-------------------|-------------------|
| N | -0.91252667540294 | 0.52302465462313  | 0.52009968359698  |
| H | -1.81157186474426 | 0.09479082380177  | 0.74904932707249  |
| C | -0.21124103148818 | -0.23890150308353 | -0.20359156678058 |
| H | 0.77643350465744  | 0.09754412545411  | -0.52095079691550 |
| H | -0.51725193302206 | -1.23264358079547 | -0.54747120697339 |

**CH<sub>2</sub>=PH** E = -380.698401953028 au

E = -380.488185044388 au [CASSCF(8,6)/MRACPF/def2-SVPD]

ZPE = 0.03350368 au

G<sub>corr</sub> = 0.01004203 au

|   |                   |                   |                   |
|---|-------------------|-------------------|-------------------|
| P | -0.93060225036893 | 0.79288524708493  | 0.66338450455867  |
| H | -2.10712136642879 | 0.00722676092153  | 0.85063335676530  |
| C | -0.08991662573356 | -0.28262314190945 | -0.28526766792258 |
| H | 0.90042073365653  | -0.01692108837998 | -0.63878046584687 |
| H | -0.44893849112525 | -1.25675325771701 | -0.59283428755453 |

**CH<sub>2</sub>=AsH** E = -2274.253966816173 au

E = -2273.87870951549 au [CASSCF(8,6)/MRACPF/def2-SVPD]

ZPE = 0.03205370 au

G<sub>corr</sub> = 0.00727674 au

|    |                   |                   |                   |
|----|-------------------|-------------------|-------------------|
| As | -0.94064290979094 | 0.86375481571746  | 0.70356262913468  |
| H  | -2.19240017614208 | -0.00543921063307 | 0.88630377251486  |
| C  | -0.05181066481508 | -0.29988694017356 | -0.31293293635698 |
| H  | 0.93845007414007  | -0.04509138454516 | -0.67131376126694 |
| H  | -0.42975432339197 | -1.26952276036566 | -0.60848426402562 |

**CH<sub>2</sub>=SbH** E = -279.377645139849 au

E = -279.093031210702 au [CASSCF(8,6)/MRACPF/def2-SVPD]

ZPE = 0.03026112 au

G<sub>corr</sub> = 0.00451724 au

|    |                   |                   |                   |
|----|-------------------|-------------------|-------------------|
| C  | -1.62309850799709 | 0.47320203637855  | -0.00009300625875 |
| H  | -0.79252777718015 | -0.22054797475481 | -0.00632368001462 |
| H  | -2.60962140691398 | 0.02497602263871  | 0.00265699038677  |
| Sb | -1.41649231932091 | 2.44266620511778  | 0.00586757021542  |
| H  | 0.30598398141215  | 2.39775722061976  | -0.00210787432882 |

**CH<sub>2</sub>=BiH** E = -253.733656015053 au  
 E = -253.380309562906 au [CASSCF(8,6)/MRACPF/def2-SVPD]  
 ZPE = 0.02936923 au  
 G<sub>corr</sub> = 0.00273683 au

|    |                   |                   |                   |
|----|-------------------|-------------------|-------------------|
| Bi | -0.96496988639926 | 1.03250636999861  | 0.79994554386096  |
| H  | -2.41533804057838 | -0.02650898950136 | 0.98507280946595  |
| C  | 0.03990367573952  | -0.33963256783928 | -0.37854950038134 |
| H  | 1.03237804489324  | -0.11929253807232 | -0.75445997841095 |
| H  | -0.36813179365512 | -1.30325775458563 | -0.65487343453462 |

**CH<sub>2</sub>=C=O** E = -152.360972698277 au  
 ZPE = 0.03152568 au  
 G<sub>corr</sub> = 0.00793395 au

|   |                   |                   |                   |
|---|-------------------|-------------------|-------------------|
| C | -0.49316902650322 | 0.52525985133606  | -0.00000012014362 |
| H | 0.05194409989926  | -0.40605082950677 | 0.00000005697985  |
| H | -1.57227740885125 | 0.53195073531458  | 0.00000005670493  |
| C | 0.16003722510022  | 1.65930245808630  | -0.00000003667546 |
| O | 0.73739971035500  | 2.66495899476982  | 0.00000004313430  |

**(1<sup>0</sup> → CH<sub>2</sub>=C=O)<sup>‡</sup>** E = -152.227655826773 au  
 ZPE = 0.02761524 au  
 G<sub>corr</sub> = 0.00369023 au  
 ν = -514.75 cm<sup>-3</sup>

|   |                   |                   |                   |
|---|-------------------|-------------------|-------------------|
| C | -0.76532062061216 | -0.44116885291061 | 0.45412511862863  |
| H | 1.25718021284142  | -0.49405244678379 | -0.12194681475370 |
| H | -1.43714433676432 | -0.72669830691020 | -0.36712661909199 |
| C | 0.40873445257940  | 0.22370058776709  | 0.04623456599838  |
| O | 0.53655029195567  | 1.43821901883748  | -0.01128625078132 |
